# Supplementary material for: The actomyosin system is essential for the integrity of the endosomal system in bloodstream form Trypanosoma brucei
Source: eLife journal article supplement (doi:10.7554/elife.96953), 2024-05-01
Supplement: fig1-data1 [file elife-96953-fig1-data1-v1.zip]

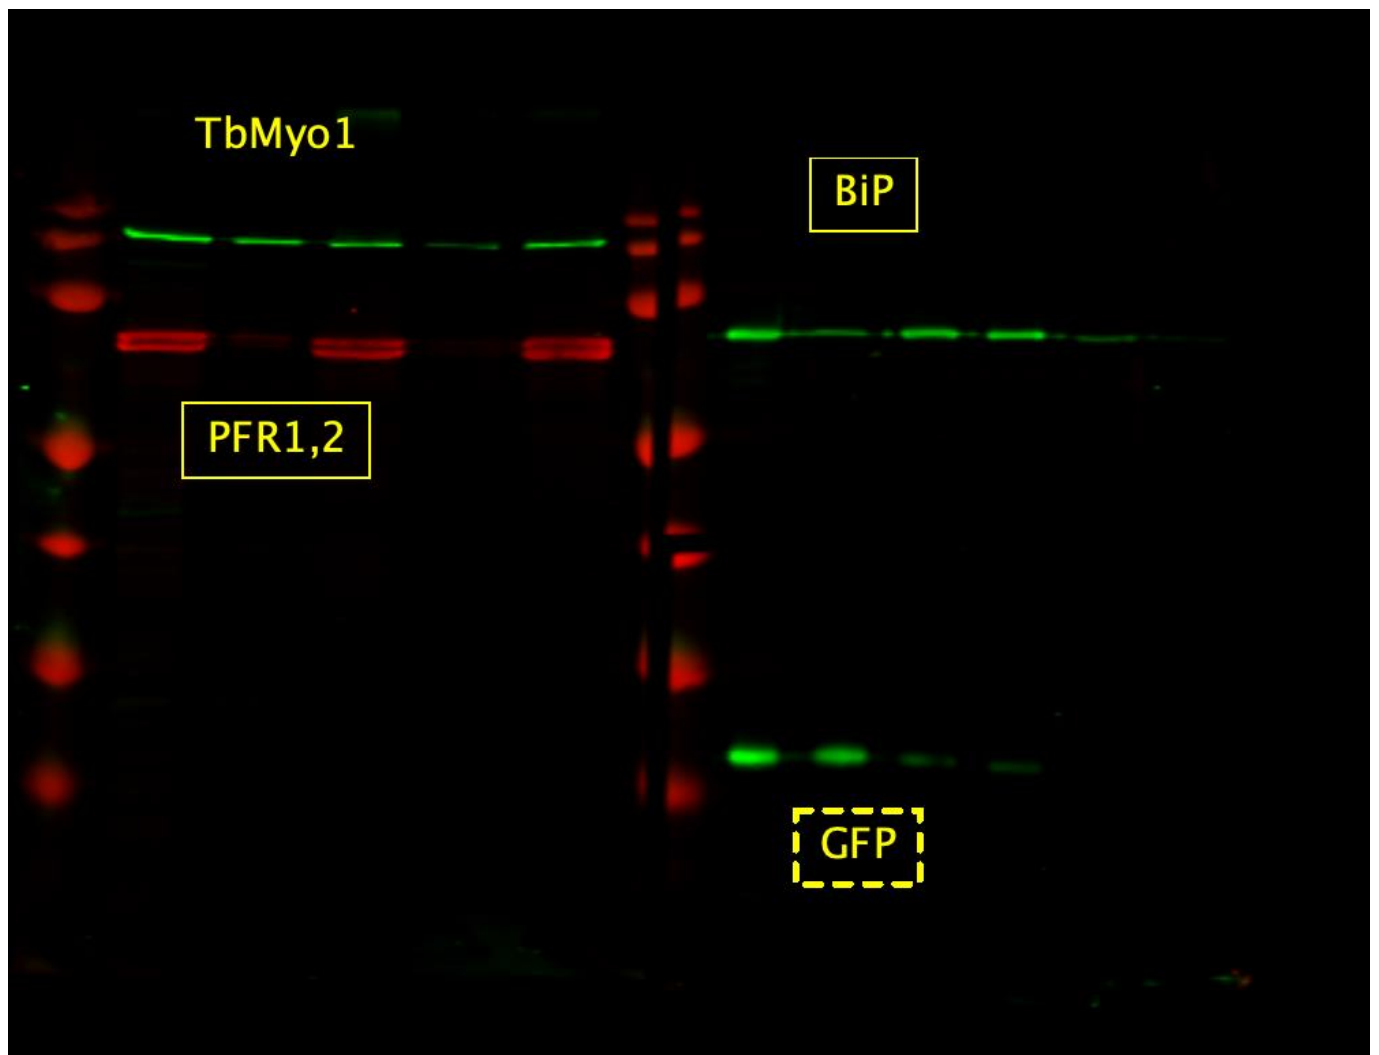

## Panel B

Single membrane cut into three parts for immunoblotting.  
All 3 Figure 3B panels taken from this immunoblot.
