# Supplementary material for: The actomyosin system is essential for the integrity of the endosomal system in bloodstream form Trypanosoma brucei
Source: eLife journal article supplement (doi:10.7554/elife.96953), 2024-05-01
Supplement: fig1-data1 [file elife-96953-fig1-data1-v1.zip]

## Sheet: Fractionation quantification
Experiment 2
TbMyo1									BiP									GFP									TbPFR1,2									Mittelwerte Input:
Image Name	Channel	Name	Signal	Total	Area	Bkgnd.	Type		Image Name	Channel	Name	Signal	Total	Area	Bkgnd.	Type		Image Name	Channel	Name	Signal	Total	Area	Bkgnd.	Type		Image Name	Channel	Name	Signal	Total	Area	Bkgnd.	Type			TbMyo1	BiP	GFP	TbPFR1,2
Fractionation-1% and 0.5% IGEPAL comparison	800	I	4930	6240	320	4.07	Signal		Fractionation-1% and 0.5% IGEPAL comparison	800	I	5310	6640	567	2.36	Signal		Fractionation-1% and 0.5% IGEPAL comparison	800	I	937	1430	250	1.96	Signal		Fractionation-1% and 0.5% IGEPAL comparison	700	I	46600	54500	544	14.5	Signal			4425	2550	735	54900
Fractionation-1% and 0.5% IGEPAL comparison	800	SN1	2420	3970	351	4.39	Signal		Fractionation-1% and 0.5% IGEPAL comparison	800	SN1	1820	2530	312	2.29	Signal		Fractionation-1% and 0.5% IGEPAL comparison	800	SN1	715	1230	260	1.97	Signal		Fractionation-1% and 0.5% IGEPAL comparison	700	SN1	5800	8000	132	16.6	Signal
Fractionation-1% and 0.5% IGEPAL comparison	800	P1	2420	4030	360	4.5	Signal		Fractionation-1% and 0.5% IGEPAL comparison	800	P1	3540	4700	540	2.15	Signal		Fractionation-1% and 0.5% IGEPAL comparison	800	P1	11.5	604	297	1.99	Signal		Fractionation-1% and 0.5% IGEPAL comparison	700	P1	46800	53100	374	16.7	Signal		Input relativ zum Mittelwert						TbMyo1					BiP
Fractionation-1% and 0.5% IGEPAL comparison	800	SN2	264	1250	203	4.85	Signal		Fractionation-1% and 0.5% IGEPAL comparison	800	SN2	1080	1590	224	2.28	Signal		Fractionation-1% and 0.5% IGEPAL comparison	800	SN2	8.09	353	175	2.06	Signal		Fractionation-1% and 0.5% IGEPAL comparison	700	SN2	9000	13300	248	17.3	Signal			TbMyo1	BiP	GFP	TbPFR1,2		I	SN1	P1	SN2	P2	I	SN1	P1
Fractionation-1% and 0.5% IGEPAL comparison	800	P2	1860	3840	392	5.05	Signal		Fractionation-1% and 0.5% IGEPAL comparison	800	P2	1720	2070	156	2.29	Signal		Fractionation-1% and 0.5% IGEPAL comparison	800	P2	11.4	468	216	2.11	Signal		Fractionation-1% and 0.5% IGEPAL comparison	700	P2	46600	56300	527	18.4	Signal		Exp. 2	111.412	208.235	127.483	84.8816		111.412	49.0872	49.0872	5.35497	37.7282	208.235	34.275	66.6667
																																				Exp. 3	90.3955	82.7451	87.2109	114.754		90.3955	10.3	80.75	17.975	76.75	82.7451	4.48815	79.6209
																																				Exp. 5	109.605	223.529	152.381	106.375		109.605	48.4536	57.9381	23.5052	35.8763	223.529	12.3509	73.1579
Experiment 3																																				Exp. 6	58.5311	36.4706	25.4422	52.2769		58.5311	38.61	40.5405	12.2008	24.0154	36.4706	37.5269	117.204
TbMyo1									BiP									GFP									TbPFR1,2									Exp. 7	106.667	83.9216	111.293	67.9417		106.667	30.5085	36.2288	7.13983	28.6017	83.9216	27.4299	83.1776
Image Name	Channel	Name	Signal	Total	Area	Bkgnd.	Type		Image Name	Channel	Name	Signal	Total	Area	Bkgnd.	Type		Image Name	Channel	Name	Signal	Total	Area	Bkgnd.	Type		Image Name	Channel	Name	Signal	Total	Area	Bkgnd.	Type		Exp. 8	62.5989	70.1961	77.551	53.1876		62.5989	57.4007	39.7112	14.6931	6.02888	70.1961	24.5251	75.419
Fractionation3_1%IGEPAL_first-for-quantifying-Myo1	800	I	4000	5160	225	5.19	Signal		Fractionation3_1%IGEPAL_first-for-quantifying-GFP-BiP	800	I	2110	3200	270	4.05	Signal		Fractionation3_1%IGEPAL_first-for-quantifying-GFP-BiP	800	I	641	1360	312	2.31	Signal		Fractionation3_1%IGEPAL_first-for-quantifying-Myo1	700	I	63000	71400	364	22.8	Signal		Exp. 9	86.1017	223.922	168.707	159.199		86.1017	11.6798	65.8793	27.2966	46.4567	223.922	4.29072	58.8441
Fractionation3_1%IGEPAL_first-for-quantifying-Myo1	800	SN1	412	1430	196	5.22	Signal		Fractionation3_1%IGEPAL_first-for-quantifying-GFP-BiP	800	SN1	94.7	1120	276	3.72	Signal		Fractionation3_1%IGEPAL_first-for-quantifying-GFP-BiP	800	SN1	197	1350	496	2.32	Signal		Fractionation3_1%IGEPAL_first-for-quantifying-Myo1	700	SN1	389	7950	308	24.6	Signal		Exp. 10	87.4576	100	51.4286	100		87.4576	32.8165	42.6357	24.7028	36.6925	100	14.6275	91.7647
Fractionation3_1%IGEPAL_first-for-quantifying-Myo1	800	P1	3230	5920	560	4.81	Signal		Fractionation3_1%IGEPAL_first-for-quantifying-GFP-BiP	800	P1	1680	3120	348	4.13	Signal		Fractionation3_1%IGEPAL_first-for-quantifying-GFP-BiP	800	P1	223	896	275	2.44	Signal		Fractionation3_1%IGEPAL_first-for-quantifying-Myo1	700	P1	60300	68200	512	15.5	Signal		Exp. 11	145.537	125.49	100	116.211		145.537	42.8571	34.472	8.19876	26.3975	125.49	26.7188	81.25
Fractionation3_1%IGEPAL_first-for-quantifying-Myo1	800	SN2	719	1750	196	5.25	Signal		Fractionation3_1%IGEPAL_first-for-quantifying-GFP-BiP	800	SN2	1690	2540	286	2.94	Signal		Fractionation3_1%IGEPAL_first-for-quantifying-GFP-BiP	800	SN2	239	971	308	2.38	Signal		Fractionation3_1%IGEPAL_first-for-quantifying-Myo1	700	SN2	855	10600	392	24.9	Signal
Fractionation3_1%IGEPAL_first-for-quantifying-Myo1	800	P2	3070	4510	261	5.5	Signal		Fractionation3_1%IGEPAL_first-for-quantifying-GFP-BiP	800	P2	349	1030	250	2.74	Signal		Fractionation3_1%IGEPAL_first-for-quantifying-GFP-BiP	800	P2	2.46	502	240	2.08	Signal		Fractionation3_1%IGEPAL_first-for-quantifying-Myo1	700	P2	62100	71700	429	22.3	Signal
Experiment 5
TbMyo1									BiP									GFP									TbPFR1,2
Image Name	Channel	Name	Signal	Total	Area	Bkgnd.	Type		Image Name	Channel	Name	Signal	Total	Area	Bkgnd.	Type		Image Name	Channel	Name	Signal	Total	Area	Bkgnd.	Type		Image Name	Channel	Name	Signal	Total	Area	Bkgnd.	Type
Fractionation_4_and_5_Myo1	800	I	4850	6010	330	3.51	Signal		Fractionation_4_and_5_Myo1	800	I	5700	6790	518	2.11	Signal		Fractionation_4_and_5_Myo1	800	I	1120	1800	384	1.76	Signal		Fractionation_4_and_5_Myo1	700	I	58400	64000	490	11.5	Signal
Fractionation_4_and_5_Myo1	800	SN1	2350	3220	270	3.21	Signal		Fractionation_4_and_5_Myo1	800	SN1	704	1280	231	2.48	Signal		Fractionation_4_and_5_Myo1	800	SN1	612	1380	468	1.65	Signal		Fractionation_4_and_5_Myo1	700	SN1	3900	7820	297	13.2	Signal
Fractionation_4_and_5_Myo1	800	P1	2810	5000	700	3.13	Signal		Fractionation_4_and_5_Myo1	800	P1	4170	5030	360	2.38	Signal		Fractionation_4_and_5_Myo1	800	P1	330	933	372	1.62	Signal		Fractionation_4_and_5_Myo1	700	P1	56900	61400	490	9.18	Signal
Fractionation_4_and_5_Myo1	800	SN2	1140	1900	248	3.04	Signal		Fractionation_4_and_5_Myo1	800	SN2	3700	4880	360	3.28	Signal		Fractionation_4_and_5_Myo1	800	SN2	252	796	330	1.65	Signal		Fractionation_4_and_5_Myo1	700	SN2	3170	6140	288	10.3	Signal
Fractionation_4_and_5_Myo1	800	P2	1740	3060	420	3.15	Signal		Fractionation_4_and_5_Myo1	800	P2	665	1410	280	2.64	Signal		Fractionation_4_and_5_Myo1	800	P2	6.91	460	300	1.51	Signal		Fractionation_4_and_5_Myo1	700	P2	58700	64500	444	13.1	Signal
Experiment 6
TbMyo1									BiP									GFP									TbPFR1,2
Image Name	Channel	Name	Signal	Total	Area	Bkgnd.	Type		Image Name	Channel	Name	Signal	Total	Area	Bkgnd.	Type		Image Name	Channel	Name	Signal	Total	Area	Bkgnd.	Type		Image Name	Channel	Name	Signal	Total	Area	Bkgnd.	Type
Fractionation_Smee1_Exp3-4-5-6_Blot	800	I	2590	3710	481	2.33	Signal		Fractionation_Smee1_Exp3-4-5-6_Blot	800	I	930	1560	429	1.46	Signal		Fractionation_Smee1_Exp3-4-5-6_Blot	800	I	187	823	455	1.4	Signal		Fractionation_Smee1_Exp3-4-5-6_Blot	700	I	28700	31900	442	7.11	Signal
Fractionation_Smee1_Exp3-4-5-6_Blot	800	SN1	1000	1910	434	2.09	Signal		Fractionation_Smee1_Exp3-4-5-6_Blot	800	SN1	349	704	248	1.43	Signal		Fractionation_Smee1_Exp3-4-5-6_Blot	800	SN1	112	634	396	1.32	Signal		Fractionation_Smee1_Exp3-4-5-6_Blot	700	SN1	2890	4490	252	6.35	Signal
Fractionation_Smee1_Exp3-4-5-6_Blot	800	P1	1050	2020	464	2.08	Signal		Fractionation_Smee1_Exp3-4-5-6_Blot	800	P1	1090	1720	432	1.46	Signal		Fractionation_Smee1_Exp3-4-5-6_Blot	800	P1	64.8	531	352	1.33	Signal		Fractionation_Smee1_Exp3-4-5-6_Blot	700	P1	28800	31100	372	6.14	Signal
Fractionation_Smee1_Exp3-4-5-6_Blot	800	SN2	316	1230	448	2.04	Signal		Fractionation_Smee1_Exp3-4-5-6_Blot	800	SN2	923	1380	315	1.46	Signal		Fractionation_Smee1_Exp3-4-5-6_Blot	800	SN2	39	496	341	1.34	Signal		Fractionation_Smee1_Exp3-4-5-6_Blot	700	SN2	2840	4870	336	6.04	Signal
Fractionation_Smee1_Exp3-4-5-6_Blot	800	P2	622	1410	377	2.09	Signal		Fractionation_Smee1_Exp3-4-5-6_Blot	800	P2	117	584	333	1.4	Signal		Fractionation_Smee1_Exp3-4-5-6_Blot	800	P2	0.403	86.4	66	1.3	Signal		Fractionation_Smee1_Exp3-4-5-6_Blot	700	P2	19900	22800	403	7.03	Signal
Experiment 7
TbMyo1									BiP									GFP									TbPFR1,2
Image Name	Channel	Name	Signal	Total	Area	Bkgnd.	Type		Image Name	Channel	Name	Signal	Total	Area	Bkgnd.	Type		Image Name	Channel	Name	Signal	Total	Area	Bkgnd.	Type		Image Name	Channel	Name	Signal	Total	Area	Bkgnd.	Type
Fractionation_7_and_8	800	I	4720	5510	270	2.94	Signal		Fractionation_7_and_8	800	I	2140	2900	370	2.05	Signal		Fractionation_7_and_8	800	I	818	1530	385	1.86	Signal		Fractionation_7_and_8	700	I	37300	58700	448	47.7	Signal
Fractionation_7_and_8	800	SN1	1440	2290	290	2.95	Signal		Fractionation_7_and_8	800	SN1	587	1040	210	2.16	Signal		Fractionation_7_and_8	800	SN1	605	1260	374	1.76	Signal		Fractionation_7_and_8	700	SN1	4370	17400	252	51.9	Signal
Fractionation_7_and_8	800	P1	1710	3310	551	2.91	Signal		Fractionation_7_and_8	800	P1	1780	2450	324	2.07	Signal		Fractionation_7_and_8	800	P1	131	762	363	1.74	Signal		Fractionation_7_and_8	700	P1	39800	60800	396	52.9	Signal
Fractionation_7_and_8	800	SN2	337	911	196	2.93	Signal		Fractionation_7_and_8	800	SN2	1470	2010	279	1.92	Signal		Fractionation_7_and_8	800	SN2	123	662	320	1.68	Signal		Fractionation_7_and_8	700	SN2	1090	15100	240	58.5	Signal
Fractionation_7_and_8	800	P2	1350	2690	416	3.22	Signal		Fractionation_7_and_8	800	P2	228	815	306	1.92	Signal		Fractionation_7_and_8	800	P2	2.04	490	288	1.69	Signal		Fractionation_7_and_8	700	P2	24100	46400	403	55.5	Signal
Experiment 8
TbMyo1									BiP									GFP									TbPFR1,2
Image Name	Channel	Name	Signal	Total	Area	Bkgnd.	Type		Image Name	Channel	Name	Signal	Total	Area	Bkgnd.	Type		Image Name	Channel	Name	Signal	Total	Area	Bkgnd.	Type		Image Name	Channel	Name	Signal	Total	Area	Bkgnd.	Type
Fractionation_7_and_8	800	I	2770	3900	324	3.51	Signal		Fractionation_7_and_8	800	I	1790	2290	260	1.94	Signal		Fractionation_7_and_8	800	I	570	991	240	1.75	Signal		Fractionation_7_and_8	700	I	29200	54000	408	60.9	Signal
Fractionation_7_and_8	800	SN1	1590	2380	288	2.75	Signal		Fractionation_7_and_8	800	SN1	439	883	225	1.97	Signal		Fractionation_7_and_8	800	SN1	369	922	325	1.7	Signal		Fractionation_7_and_8	700	SN1	4220	24300	396	50.7	Signal
Fractionation_7_and_8	800	P1	1100	1950	310	2.71	Signal		Fractionation_7_and_8	800	P1	1350	1780	225	1.92	Signal		Fractionation_7_and_8	800	P1	14.7	386	230	1.61	Signal		Fractionation_7_and_8	700	P1	27700	52200	510	48.2	Signal
Fractionation_7_and_8	800	SN2	407	1300	330	2.7	Signal		Fractionation_7_and_8	800	SN2	1190	1640	234	1.9	Signal		Fractionation_7_and_8	800	SN2	15.2	470	286	1.59	Signal		Fractionation_7_and_8	700	SN2	11900	27600	330	47.4	Signal
Fractionation_7_and_8	800	P2	167	1090	340	2.71	Signal		Fractionation_7_and_8	800	P2	137	542	225	1.8	Signal		Fractionation_7_and_8	800	P2	3.12	337	207	1.61	Signal		Fractionation_7_and_8	700	P2	18100	42700	532	46.1	Signal
Experiment 9
TbMyo1									BiP									GFP									TbPFR1,2
Image Name	Channel	Name	Signal	Total	Area	Bkgnd.	Type		Image Name	Channel	Name	Signal	Total	Area	Bkgnd.	Type		Image Name	Channel	Name	Signal	Total	Area	Bkgnd.	Type		Image Name	Channel	Name	Signal	Total	Area	Bkgnd.	Type
Fractionation_9	800	I	3810	5270	297	4.92	Signal		Fractionation_9	800	I	5710	6810	396	2.76	Signal		Fractionation_9	800	I	1240	2170	385	2.44	Signal		Fractionation_9	700	I	87400	98200	544	19.9	Signal
Fractionation_9	800	SN1	445	1940	310	4.81	Signal		Fractionation_9	800	SN1	245	1440	480	2.48	Signal		Fractionation_9	800	SN1	243	1400	495	2.33	Signal		Fractionation_9	700	SN1	1260	9810	448	19.1	Signal
Fractionation_9	800	P1	2510	4320	377	4.8	Signal		Fractionation_9	800	P1	3360	4310	363	2.64	Signal		Fractionation_9	800	P1	475	1190	310	2.32	Signal		Fractionation_9	700	P1	85300	92700	462	16.1	Signal
Fractionation_9	800	SN2	1040	2310	261	4.87	Signal		Fractionation_9	800	SN2	2820	3690	306	2.87	Signal		Fractionation_9	800	SN2	295	1120	344	2.4	Signal		Fractionation_9	700	SN2	3610	11200	351	21.6	Signal
Fractionation_9	800	P2	1770	3510	348	5	Signal		Fractionation_9	800	P2	442	1270	315	2.63	Signal		Fractionation_9	800	P2	22.2	467	203	2.19	Signal		Fractionation_9	700	P2	84300	92600	416	19.8	Signal
Experiment 10
TbMyo1									BiP									GFP									TbPFR1,2
Image Name	Channel	Name	Signal	Total	Area	Bkgnd.	Type		Image Name	Channel	Name	Signal	Total	Area	Bkgnd.	Type		Image Name	Channel	Name	Signal	Total	Area	Bkgnd.	Type		Image Name	Channel	Name	Signal	Total	Area	Bkgnd.	Type
Fractionation_10	800	I	3870	5550	374	4.49	Signal		Fractionation_10	800	I	2550	3320	406	1.88	Signal		Fractionation_10	800	I	378	841	297	1.56	Signal		Fractionation_10	700	I	54900	65900	589	18.8	Signal
Fractionation_10	800	SN1	1270	2740	364	4.05	Signal		Fractionation_10	800	SN1	373	797	216	1.96	Signal		Fractionation_10	800	SN1	180	686	330	1.53	Signal		Fractionation_10	700	SN1	1450	7990	341	19.2	Signal
Fractionation_10	800	P1	1650	2580	243	3.82	Signal		Fractionation_10	800	P1	2340	2910	288	1.99	Signal		Fractionation_10	800	P1	136	501	216	1.69	Signal		Fractionation_10	700	P1	46200	52000	476	12.2	Signal
Fractionation_10	800	SN2	956	1700	203	3.66	Signal		Fractionation_10	800	SN2	1750	2540	350	2.27	Signal		Fractionation_10	800	SN2	97	333	150	1.57	Signal		Fractionation_10	700	SN2	1620	5110	253	13.8	Signal
Fractionation_10	800	P2	1420	2310	248	3.6	Signal		Fractionation_10	800	P2	305	833	248	2.13	Signal		Fractionation_10	800	P2	0.965	286	176	1.62	Signal		Fractionation_10	700	P2	39600	46200	672	9.86	Signal
Experiment 11
TbMyo1									BiP									GFP									TbPFR1,2
Image Name	Channel	Name	Signal	Total	Area	Bkgnd.	Type		Image Name	Channel	Name	Signal	Total	Area	Bkgnd.	Type		Image Name	Channel	Name	Signal	Total	Area	Bkgnd.	Type		Image Name	Channel	Name	Signal	Total	Area	Bkgnd.	Type
Fractionation_11	800	I	6440	8300	468	3.96	Signal		Fractionation_11	800	I	3200	3780	312	1.86	Signal		Fractionation_11	800	I	735	1170	264	1.66	Signal		Fractionation_11	700	I	63800	71600	490	15.9	Signal		Mittelwerte Input:							TbMyo1					BiP
Fractionation_11	800	SN1	2760	3890	319	3.55	Signal		Fractionation_11	800	SN1	855	1300	208	2.13	Signal		Fractionation_11	800	SN1	403	936	336	1.59	Signal		Fractionation_11	700	SN1	7720	15700	429	18.5	Signal			TbMyo1	BiP	GFP	TbPFR1,2			I	SN1	P1	SN2	P2	I	SN1
Fractionation_11	800	P1	2220	3180	308	3.12	Signal		Fractionation_11	800	P1	2600	3180	270	2.16	Signal		Fractionation_11	800	P1	103	679	377	1.53	Signal		Fractionation_11	700	P1	43500	47600	455	8.98	Signal			4425	3710	789	52500			111.412	49.0872				143.127
Fractionation_11	800	SN2	528	1250	232	3.11	Signal		Fractionation_11	800	SN2	2370	2970	336	1.81	Signal		Fractionation_11	800	SN2	79.8	425	230	1.5	Signal		Fractionation_11	700	SN2	3300	6320	341	8.86	Signal									90.3955	10.3				56.8733
Fractionation_11	800	P2	1700	3440	522	3.34	Signal		Fractionation_11	800	P2	392	654	156	1.68	Signal		Fractionation_11	800	P2	3.13	223	153	1.43	Signal		Fractionation_11	700	P2	65700	70600	468	10.5	Signal									109.605					153.639
																																				Input relativ zum Mittelwert							58.5311					25.0674
																																					TbMyo1	BiP	GFP	TbPFR1,2
DO NOT USE:																																				Exp. 2	111.412	143.127	118.758	88.7619
Image Name	Channel	Name	Signal	Total	Area	Bkgnd.	Type		Image Name	Channel	Name	Signal	Total	Area	Bkgnd.	Type		Image Name	Channel	Name	Signal	Total	Area	Bkgnd.	Type											Exp. 3	90.3955	56.8733	81.2421	120
RNAi_and_Fract_11	800	I	2590	3310	330	2.18	Signal		RNAi_and_Fract_11	800	I	2150	2790	300	2.13	Signal		RNAi_and_Fract_11	800	I	2990	3650	325	2.01	Signal											Exp. 5	109.605	153.639	141.952	111.238
RNAi_and_Fract_11	800	SN1	1160	1640	224	2.12	Signal		RNAi_and_Fract_11	800	SN1	477	1260	234	3.33	Signal		RNAi_and_Fract_11	800	SN1	2070	2750	338	2.02	Signal											Exp. 6	58.5311	25.0674	23.7009	54.6667
RNAi_and_Fract_11	800	P1	1280	1840	261	2.12	Signal		RNAi_and_Fract_11	800	P1	1530	2080	225	2.47	Signal		RNAi_and_Fract_11	800	P1	578	1120	297	1.83	Signal
RNAi_and_Fract_11	800	SN2	402	876	210	2.26	Signal		RNAi_and_Fract_11	800	SN2	1410	1960	200	2.75	Signal		RNAi_and_Fract_11	800	SN2	514	951	275	1.59	Signal
RNAi_and_Fract_11	800	P2	1360	1890	217	2.43	Signal		RNAi_and_Fract_11	800	P2	357	938	224	2.59	Signal		RNAi_and_Fract_11	800	P2	2.03	357	240	1.48	Signal
																				mean GFP SN1
																			ex. 2-6	409
																			ex. 7-11	360
																			all	381.778
[truncated: 14 more columns]
