# Supplementary material for: The actomyosin system is essential for the integrity of the endosomal system in bloodstream form Trypanosoma brucei
Source: eLife journal article supplement (doi:10.7554/elife.96953), 2024-05-01
Supplement: fig1-figsupp1-data1 [file elife-96953-fig1-figsupp1-data1-v1.zip]

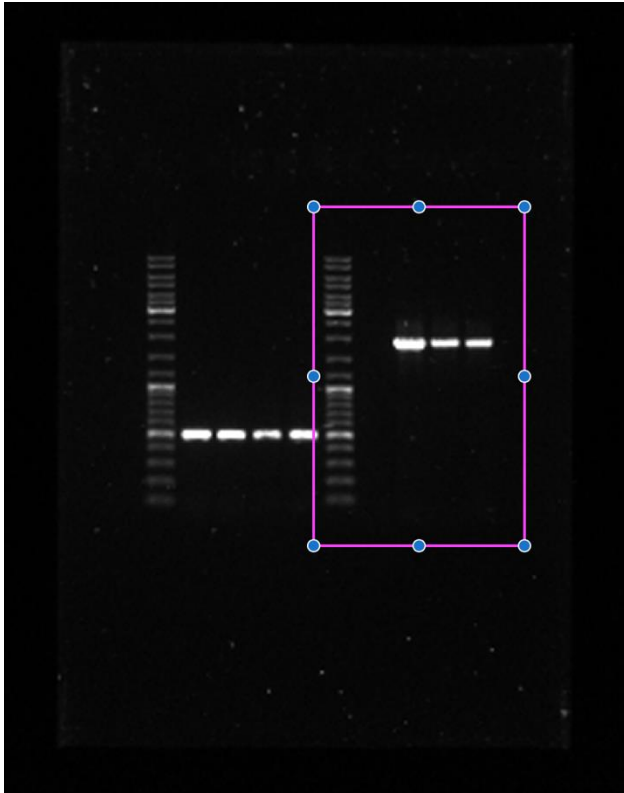

Panel B  
Displayed  
area inside  
magenta  
rectangle.

Panel C  
Displayed  
area inside  
magenta  
rectangle.

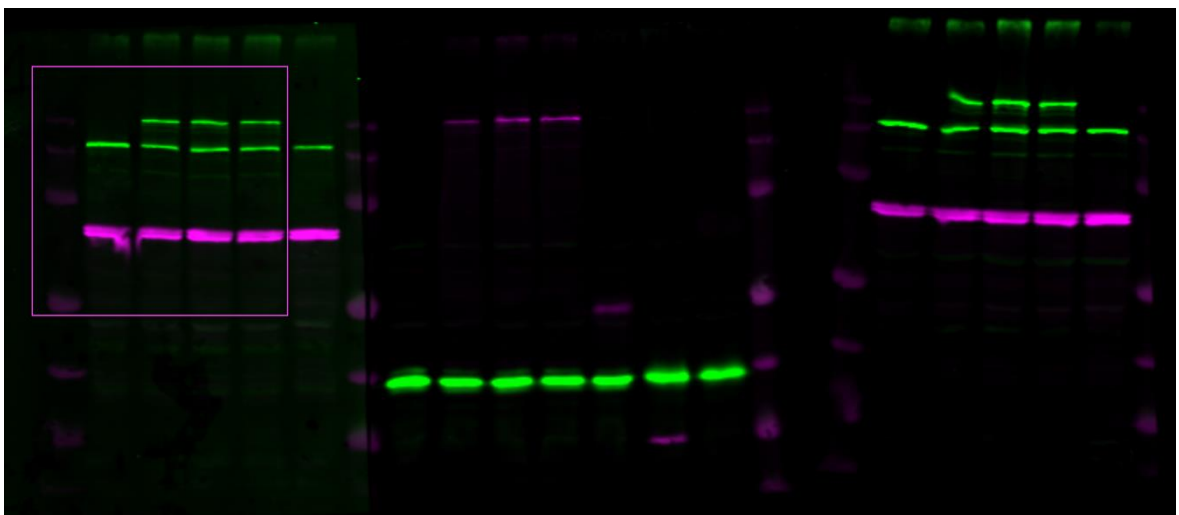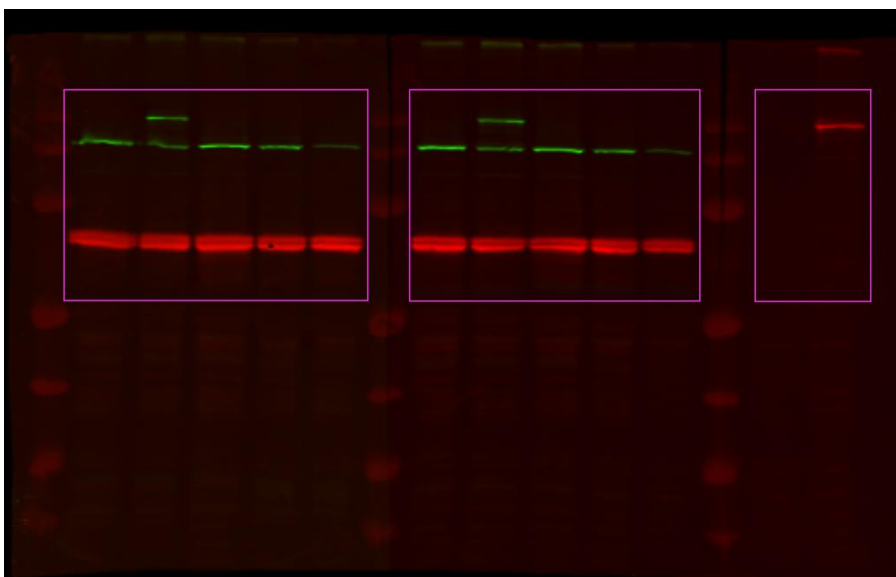

Panel D  
Displayed  
areas inside  
magenta  
rectangles.
