# Supplementary material for: The actomyosin system is essential for the integrity of the endosomal system in bloodstream form Trypanosoma brucei
Source: eLife journal article supplement (doi:10.7554/elife.96953), 2024-05-01
Supplement: fig1-figsupp2-data1 [file elife-96953-fig1-figsupp2-data1-v1.zip]

## Sheet: Tabelle1
time course over 4days	1day=Tuesday
			time course 1		start	end	induction (tet 1mg/ml)		0
procedure:			time period		2022-01-31	2022-02-04	11:35:00		2x10
seed cells on Mon and Wed at 5e3									2.0x105
used in T25 flask, 10 ml media			time course 2		start	end	induction (tet 1mg/ml)		4.0x105
control induction 70% EtOH (10µl)			time period		2022-02-14	2022-02-18	15:25:00
induction with 1 mg/ml tetracycline (10µl)
induction from Monday to Thrusday on same time point			time course 3		start	end	induction (tet 1mg/ml)
WCL done on Wed. and Fri			time period		2022-02-21	2022-02-25	12:25:00
samples	SM RNAi Myo21 C3
	SM RNAi Myo21 C4				1x10	10000
	SM RNAi Myo21 C5
		time course 1	growth curve 1		time in h
			tetracycline (1mg/ml)	0	24	48	48	72	96
		RNAi C3 (tet-)	-	0	104750	504250	5000	131500	1371000
		RNAi C3 (tet+)	+	0	86750	386750	5000	134500	1291000
		RNAi C4 (tet-)	-	0	138000	493500	5000	180750	1820000
		RNAi C4 (tet+)	+	0	80250	433250	5000	161000	1551000
		RNAi C5 (tet-)	-	0	113000	392500	5000	124750	1379000
		RNAi C5 (tet+)	+	0	76750	355500	5000	117500	1030000
		time course 2	growth curve 2		time
			tetracycline (1mg/ml)	0	24	48	48	72	96
		RNAi C3 (tet-)	-	0	128750	952250	5000	138750	904750
		RNAi C3 (tet+)	+	0	143750	910750	5000	124000	1202000
		RNAi C4 (tet-)	-	0	144250	1059000	5000	160750	1151000
		RNAi C4 (tet+)	+	0	142750	969250	5000	140750	1532000
		RNAi C5 (tet-)	-	0	119000	721500	5000	143250	1137000
		RNAi C5 (tet+)	+	0	119500	664750	5000	134000	1469000
		time course 3	growth curve 3
			tetracycline (1mg/ml)	0	24	48	48	72	96
		RNAi C3 (tet-)	-	0	119750	717500	5000	167000	1657000
		RNAi C3 (tet+)	+	0	117000	605000	5000	172000	1366000
		RNAi C4 (tet-)	-	0	110500	893000	5000	161000	1974000
		RNAi C4 (tet+)	+	0	108000	791500	5000	184500	1689000
		RNAi C5 (tet-)	-	0	108750	657000	5000	141000	1552000
		RNAi C5 (tet+)	+	0	93000	574250	5000	146750	1298000
									count 1h 15 min later

## Sheet: Tabelle2
Calclulation of the standard deviation								Mix the different time courses and arranged in clones
time course 1	growth curve 1		time in h						Clone 3			time in h							Clone 4			time in h
	tetracycline (1mg/ml)	0	24	48	48	72	96			tetracycline (1mg/ml)	0	24	48	48	72	96				tetracycline (1mg/ml)	0	24	48	48	72	96
RNAi C3 (tet-)	-	5000	104750	504250	5000	131500	1371000		RNAi C3 (tet-)	-	5000	104750	504250	5000	131500	1371000			RNAi C4 (tet-)	-	5000	138000	493500	5000	180750	1820000
RNAi C3 (tet+)	+	5000	86750	386750	5000	134500	1291000		RNAi C3 (tet-)	-	5000	128750	952250	5000	138750	904750			RNAi C4 (tet-)	-	5000	144250	1059000	5000	160750	1151000
RNAi C4 (tet-)	-	5000	138000	493500	5000	180750	1820000		RNAi C3 (tet-)	-	5000	119750	717500	5000	167000	1657000	count 1h 15 min later		RNAi C4 (tet-)	-	5000	110500	893000	5000	161000	1974000
RNAi C4 (tet+)	+	5000	80250	433250	5000	161000	1551000		mean		5000	117750	724667	5000	145750	1.31092e+06			mean		5000	130917	815167	5000	167500	1.64833e+06
RNAi C5 (tet-)	-	5000	113000	392500	5000	124750	1379000		standard deviation		0	9899.49	182965	0	15314.8	310030			standard deviation		0	14660.5	237334	0	9369.72	357243
RNAi C5 (tet+)	+	5000	76750	355500	5000	117500	1030000		RNAi C3 (tet+)	+	5000	86750	386750	5000	134500	1291000			RNAi C4 (tet+)	+	5000	80250	433250	5000	161000	1551000
									RNAi C3 (tet+)	+	5000	143750	910750	5000	124000	1202000			RNAi C4 (tet+)	+	5000	142750	969250	5000	140750	1532000
time course 2	growth curve 2		time						RNAi C3 (tet+)	+	5000	117000	605000	5000	172000	1366000	count 1h 15 min later		RNAi C4 (tet+)	+	5000	108000	791500	5000	184500	1689000
	tetracycline (1mg/ml)	0	24	48	48	72	96		mean		5000	115833	634167	5000	143500	1.28633e+06			mean		5000	110333	731333	5000	162083	1.59067e+06
RNAi C3 (tet-)	-	5000	128750	952250	5000	138750	904750		standard deviation		0	23284.8	214914	0	20603.4	67034			standard deviation		0	25568.8	222919	0	17877.3	69963.5
RNAi C3 (tet+)	+	5000	143750	910750	5000	124000	1202000
RNAi C4 (tet-)	-	5000	144250	1059000	5000	160750	1151000
RNAi C4 (tet+)	+	5000	142750	969250	5000	140750	1532000								All three graphs
RNAi C5 (tet-)	-	5000	119000	721500	5000	143250	1137000								x-axis	time in h
RNAi C5 (tet+)	+	5000	119500	664750	5000	134000	1469000								y-axis	cell population density (cells/ml)
time course 3	growth curve 3
	tetracycline (1mg/ml)	0	24	48	48	72	96
RNAi C3 (tet-)	-	5000	119750	717500	5000	167000	1657000
RNAi C3 (tet+)	+	5000	117000	605000	5000	172000	1366000
RNAi C4 (tet-)	-	5000	110500	893000	5000	161000	1974000
RNAi C4 (tet+)	+	5000	108000	791500	5000	184500	1689000
RNAi C5 (tet-)	-	5000	108750	657000	5000	141000	1552000
RNAi C5 (tet+)	+	5000	93000	574250	5000	146750	1298000
							count 1h 15 min later
									Clone 5			time in h
										tetracycline (1mg/ml)	0	24	48	48	72	96
									RNAi C5 (tet-)	-	5000	113000	392500	5000	124750	1379000
									RNAi C5 (tet-)	-	5000	119000	721500	5000	143250	1137000
									RNAi C5 (tet-)	-	5000	108750	657000	5000	141000	1552000
									mean		5000	113583	590333	5000	136333	1356000
									standard deviation		0	4204.83	142346	0	8242	170202
									RNAi C5 (tet+)	+	5000	76750	355500	5000	117500	1030000
									RNAi C5 (tet+)	+	5000	119500	664750	5000	134000	1469000
									RNAi C5 (tet+)	+	5000	93000	574250	5000	146750	1298000
									mean		5000	96416.7	531500	5000	132750	1.26567e+06
									standard deviation		0	17619	129819	0	11973.9	180673
									all clones			time in h
										tetracycline (1mg/ml)	0	24	48	48	72	96
								tet-	mean		5000	120750	710056	5000	149861	1.43842e+06
									standard deviation		0	7387.43	92367.5	0	13051.6	149570
								tet+	mean		5000	107528	632333	5000	146111	1.38089e+06
									standard deviation		0	8171.29	81591.9	0	12116.8	148575
