# Supplementary material for: The actomyosin system is essential for the integrity of the endosomal system in bloodstream form Trypanosoma brucei
Source: eLife journal article supplement (doi:10.7554/elife.96953), 2024-05-01
Supplement: fig2-data1 [file elife-96953-fig2-data1-v1.zip]

## Sheet: Fig. 2
Fig. 2e
	Histogram	Bin size 10nm			Curve fit
	Bin centers	Counts			x	y
	0.0345	1			-0.0105	0.05153
	0.0445	3			-0.01022	0.05298
	0.0545	6			-0.00994	0.05448
	0.0645	10			-0.00966	0.05601
	0.0745	17			-0.00938	0.05758
	0.0845	34			-0.0091	0.0592
	0.0945	30			-0.00882	0.06085
	0.1045	43			-0.00854	0.06255
	0.1145	49			-0.00826	0.0643
	0.1245	49			-0.00798	0.06608
	0.1345	59			-0.0077	0.06792
	0.1445	49			-0.00742	0.0698
	0.1545	41			-0.00714	0.07172
	0.1645	26			-0.00686	0.0737
	0.1745	26			-0.00658	0.07573
	0.1845	16			-0.0063	0.07781
	0.1945	14			-0.00602	0.07994
	0.2045	9			-0.00574	0.08213
	0.2145	11			-0.0055	0.084
	0.2245	2			-0.00545	0.08437
	0.2345	2			-0.00517	0.08666
					-0.00489	0.08902
					-0.00461	0.09143
					-0.00433	0.0939
					-0.00405	0.09644
					-0.00377	0.09903
					-0.00349	0.1017
					-0.00321	0.10442
					-0.00293	0.10722
					-0.00265	0.11008
					-0.00237	0.11301
					-0.00209	0.11602
					-0.00181	0.1191
					-0.00153	0.12225
					-0.00125	0.12548
					-9.7047	0.12879
					-6.9019	0.13217
					-4.0991	0.13564
					-1.2963	0.13919
					15.0651	0.14283
					43.0931	0.14655
					71.1211	0.15037
					99.1491	0.15427
					0.00127	0.15826
					0.00155	0.16235
					0.00183	0.16654
					0.00211	0.17082
					0.00239	0.17521
					0.00267	0.17969
					0.00295	0.18429
					0.00323	0.18898
					0.00351	0.19379
					0.00379	0.19871
					0.00407	0.20374
					0.00435	0.20889
					0.0045	0.2116
					0.00464	0.21415
					0.00492	0.21954
					0.0052	0.22505
					0.00548	0.23068
					0.00576	0.23644
					0.00604	0.24233
					0.00632	0.24836
					0.0066	0.25452
					0.00688	0.26081
					0.00716	0.26725
					0.00744	0.27384
					0.00772	0.28057
					0.008	0.28744
					0.00828	0.29447
					0.00856	0.30166
					0.00884	0.309
					0.00912	0.31651
					0.0094	0.32417
					0.00968	0.33201
					0.00996	0.34001
					0.01024	0.34819
					0.01052	0.35655
					0.0108	0.36509
					0.01108	0.3738
					0.01136	0.38271
					0.01164	0.39181
					0.01192	0.4011
					0.0122	0.41058
					0.01248	0.42027
					0.01276	0.43016
					0.01304	0.44026
					0.01332	0.45058
					0.0136	0.4611
					0.01388	0.47185
					0.01416	0.48282
					0.01444	0.49402
					0.0145	0.49625
					0.01473	0.50545
					0.01501	0.51712
					0.01529	0.52902
					0.01557	0.54117
					0.01585	0.55356
					0.01613	0.56621
					0.01641	0.57912
					0.01669	0.59228
					0.01697	0.60571
					0.01725	0.61941
					0.01753	0.63339
					0.01781	0.64764
					0.01809	0.66218
					0.01837	0.677
					0.01865	0.69212
					0.01893	0.70754
					0.01921	0.72326
					0.01949	0.73929
					0.01977	0.75563
					0.02005	0.77228
					0.02033	0.78926
					0.02061	0.80657
					0.02089	0.82422
					0.02117	0.8422
					0.02145	0.86052
					0.02173	0.87919
					0.02201	0.89822
					0.02229	0.91761
					0.02257	0.93737
					0.02285	0.95749
					0.02313	0.978
					0.02341	0.99888
					0.02369	102016
					0.02397	104183
					0.02425	10639
					0.0245	108354
					0.02454	108638
					0.02482	110927
					0.0251	113258
					0.02538	115631
					0.02566	118047
					0.02594	120507
					0.02622	123012
					0.0265	125562
					0.02678	128157
					0.02706	130798
					0.02734	133487
					0.02762	136223
					0.0279	139007
					0.02818	14184
					0.02846	144723
					0.02874	147656
					0.02902	150641
					0.0293	153677
					0.02958	156765
					0.02986	159906
					0.03014	163101
					0.03042	166351
					0.0307	169656
					0.03098	173017
					0.03126	176434
					0.03154	179909
					0.03182	183442
					0.0321	187034
					0.03238	190685
					0.03266	194397
					0.03294	19817
					0.03322	202005
					0.0335	205903
					0.03378	209864
					0.03406	213889
					0.03434	217979
					0.0345	220271
					0.03463	222135
					0.03491	226357
					0.03519	230647
					0.03547	235005
					0.03575	239432
					0.03603	243928
					0.03631	248495
					0.03659	253133
					0.03687	257843
					0.03715	262627
					0.03743	267483
					0.03771	272415
					0.03799	277422
					0.03827	282505
					0.03855	287665
					0.03883	292902
					0.03911	298219
					0.03939	303614
					0.03967	30909
					0.03995	314648
					0.04023	320287
					0.04051	326008
					0.04079	331814
					0.04107	337704
					0.04135	343679
					0.04163	34974
					0.04191	355888
					0.04219	362124
					0.04247	368449
					0.04275	374862
					0.04303	381366
					0.04331	387962
					0.04359	394649
					0.04387	401429
					0.04415	408302
					0.04443	41527
					0.0445	416901
					0.04472	422332
					0.045	429491
					0.04528	436747
					0.04556	4441
					0.04584	451552
					0.04612	459103
					0.0464	466755
					0.04668	474507
					0.04696	48236
					0.04724	490317
					0.04752	498376
					0.0478	506539
					0.04808	514808
					0.04836	523182
					0.04864	531662
					0.04892	540249
					0.0492	548944
					0.04948	557748
					0.04976	566661
					0.05004	575685
					0.05032	584819
					0.0506	594065
					0.05088	603423
					0.05116	612894
					0.05144	622479
					0.05172	632178
					0.052	641992
					0.05228	651922
					0.05256	661969
					0.05284	672132
					0.05312	682414
					0.0534	692813
					0.05368	703332
					0.05396	71397
					0.05424	724729
					0.0545	734632
					0.05453	735608
					0.05481	746609
					0.05509	757732
					0.05537	768977
					0.05565	780345
					0.05593	791837
					0.05621	803453
					0.05649	815194
					0.05677	82706
					0.05705	839051
					0.05733	851169
					0.05761	863413
					0.05789	875784
					0.05817	888282
					0.05845	900908
					0.05873	913662
					0.05901	926545
					0.05929	939557
					0.05957	952698
					0.05985	965969
					0.06013	979369
					0.06041	9929
					0.06069	1006561
					0.06097	1020352
					0.06125	1034275
					0.06153	1048329
					0.06181	1062514
					0.06209	107683
					0.06237	1091278
					0.06265	1105858
					0.06293	112057
					0.06321	1135414
					0.06349	115039
					0.06377	1165498
					0.06405	1180738
					0.06433	119611
					0.0645	120523
					0.06462	1211614
					0.0649	122725
					0.06518	1243019
					0.06546	1258919
					0.06574	1274951
					0.06602	1291115
					0.0663	130741
					0.06658	1323837
					0.06686	1340394
					0.06714	1357083
					0.06742	1373902
					0.0677	1390852
					0.06798	1407932
					0.06826	1425141
					0.06854	144248
					0.06882	1459948
					0.0691	1477544
					0.06938	1495269
					0.06966	1513121
					0.06994	15311
					0.07022	1549206
					0.0705	1567438
					0.07078	1585796
					0.07106	1604279
					0.07134	1622885
					0.07162	1641616
					0.0719	166047
					0.07218	1679445
					0.07246	1698543
					0.07274	171776
					0.07302	1737098
					0.0733	1756555
					0.07358	177613
					0.07386	1795823
					0.07414	1815632
					0.07442	1835556
					0.0745	1840913
					0.07471	1855595
					0.07499	1875747
					0.07527	1896012
					0.07555	1916388
					0.07583	1936874
					0.07611	195747
					0.07639	1978173
					0.07667	1998983
					0.07695	2019898
					0.07723	2040918
					0.07751	2062041
					0.07779	2083265
					0.07807	210459
					0.07835	2126014
					0.07863	2147535
					0.07891	2169152
					0.07919	2190864
					0.07947	2212669
					0.07975	2234566
					0.08003	2256552
					0.08031	2278627
					0.08059	2300789
					0.08087	2323035
					0.08115	2345366
					0.08143	2367778
					0.08171	239027
					0.08199	241284
					0.08227	2435486
					0.08255	2458207
					0.08283	2481001
					0.08311	2503865
					0.08339	2526799
					0.08367	2549799
					0.08395	2572864
					0.08423	2595992
					0.0845	2617937
					0.08452	2619181
					0.0848	2642429
					0.08508	2665733
					0.08536	2689092
					0.08564	2712504
					0.08592	2735965
					0.0862	2759475
					0.08648	278303
					0.08676	2806629
					0.08704	2830269
					0.08732	2853948
					0.0876	2877663
					0.08788	2901413
					0.08816	2925194
					0.08844	2949005
					0.08872	2972843
					0.089	2996705
					0.08928	3020589
					0.09348	337972
					0.09376	3403598
					0.09404	3427452
					0.09432	345128
					0.0945	3466158
					0.09461	3475078
					0.09489	3498844
					0.09517	3522575
					0.09545	3546268
					0.09573	3569919
					0.09601	3593527
					0.09629	3617088
					0.09657	3640598
					0.09685	3664056
					0.09713	3687458
					0.09741	3710801
					0.09769	3734082
					0.09797	3757298
					0.09825	3780447
					0.09853	3803524
					0.09881	3826528
					0.09909	3849454
					0.09937	3872301
					0.09965	3895064
					0.09993	3917741
					0.10021	3940329
					0.10049	3962825
					0.10077	3985226
					0.10105	4007528
					0.10133	4029728
					0.10161	4051824
					0.10189	4073813
					0.10217	4095691
					0.10245	4117455
					0.10273	4139103
					0.10301	4160631
					0.10329	4182036
					0.10357	4203315
					0.10385	4224465
					0.10413	4245484
					0.10441	4266367
					0.1045	4272679
					0.1047	4287112
					0.10498	4307717
					0.10526	4328177
					0.10554	4348491
					0.10582	4368654
					0.1061	4388665
					0.10638	440852
					0.10666	4428216
					0.10694	444775
					0.10722	446712
					0.1075	4486322
					0.10778	4505354
					0.10806	4524213
					0.10834	4542895
					0.10862	4561399
					0.1089	457972
					0.10918	4597857
					0.10946	4615807
					0.10974	4633567
					0.11002	4651134
					0.1103	4668506
					0.11058	4685679
					0.11086	4702651
					0.11114	471942
					0.11142	4735983
					0.1117	4752338
					0.11198	4768481
					0.11226	478441
					0.11254	4800123
					0.11282	4815617
					0.1131	483089
					0.11338	4845939
					0.11366	4860762
					0.11394	4875357
					0.11422	4889722
					0.1145	4903603
					0.11451	4903853
					0.11479	4917749
					0.11507	4931407
					0.11535	4944826
					0.11563	4958003
					0.11591	4970936
					0.11619	4983623
					0.11647	4996062
					0.11675	5008251
					0.11703	5020187
					0.11731	503187
					0.11759	5043296
					0.11787	5054465
					0.11815	5065374
					0.11843	5076022
					0.11871	5086407
					0.11899	5096526
					0.11927	5106379
					0.11955	5115964
					0.11983	5125279
					0.12011	5134323
					0.12039	5143094
					0.12067	5151591
					0.12095	5159812
					0.12123	5167756
					0.12151	5175422
					0.12179	5182808
					0.12207	5189914
					0.12235	5196737
					0.12263	5203277
					0.12291	5209533
					0.12319	5215504
					0.12347	5221188
					0.12375	5226585
					0.12403	5231694
					0.12431	5236514
					0.1245	523954
					0.1246	5241045
					0.12488	5245284
					0.12516	5249232
					0.12544	5252889
					0.12572	5256253
					0.126	5259323
					0.12628	5262101
					0.12656	5264584
					0.12684	5266772
					0.12712	5268666
					0.1274	5270264
					0.12768	5271567
					0.12796	5272574
					0.12824	5273286
					0.12852	5273701
					0.1288	527382
					0.12908	5273643
					0.12936	5273171
					0.12964	5272402
					0.12992	5271337
					0.1302	5269977
					0.13048	5268321
					0.13076	5266371
					0.13104	5264125
					0.13132	5261585
					0.1316	5258751
					0.13188	5255623
					0.13216	5252202
					0.13244	5248489
					0.13272	5244484
					0.133	5240188
					0.13328	5235602
					0.13356	5230726
					0.13384	5225561
					0.13412	5220108
					0.1344	5214368
					0.1345	5212355
					0.13469	5208342
					0.13497	5202031
					0.13525	5195435
					0.13553	5188557
					0.13581	5181397
					0.13609	5173957
					0.13637	5166237
					0.13665	5158239
					0.13693	5149964
					0.13721	5141414
					0.13749	513259
					0.13777	5123493
					0.13805	5114126
					0.13833	5104489
					0.13861	5094584
					0.13889	5084412
					0.13917	5073977
					0.13945	5063278
					0.13973	5052319
					0.14001	50411
					0.14029	5029623
					0.14057	5017891
					0.14085	5005906
					0.14113	4993668
					0.14141	4981181
					0.14169	4968446
					0.14197	4955466
					0.14225	4942242
					0.14253	4928776
					0.14281	4915071
					0.14309	490113
					0.14337	4886953
					0.14365	4872544
					0.14393	4857904
					0.14421	4843037
					0.14449	4827944
					0.1445	4827672
					0.14478	4812628
					0.14506	4797091
					0.14534	4781336
					0.14562	4765365
					0.1459	4749181
					0.14618	4732786
					0.14646	4716183
					0.14674	4699374
					0.14702	4682363
					0.1473	4665151
					0.14758	4647741
					0.14786	4630137
					0.14814	461234
					0.14842	4594353
					0.1487	457618
					0.14898	4557823
					0.14926	4539284
					0.14954	4520568
					0.14982	4501675
					0.1501	448261
					0.15038	4463375
					0.15066	4443973
					0.15094	4424407
					0.15122	440468
					0.1515	4384795
					0.15178	4364754
					0.15206	4344561
					0.15234	4324219
					0.15262	4303731
					0.1529	4283099
					0.15318	4262326
					0.15346	4241416
					0.15374	4220372
					0.15402	4199197
					0.1543	4177893
					0.1545	4162982
					0.15459	4156464
					0.15487	4134912
					0.15515	4113242
					0.15543	4091455
					0.15571	4069556
					0.15599	4047546
					0.15627	4025429
					0.15655	4003209
					0.15683	3980887
					0.15711	3958468
					0.15739	3935954
					0.15767	3913348
					0.15795	3890654
					0.15823	3867874
					0.15851	3845012
					0.15879	3822071
					0.15907	3799053
					0.15935	3775961
					0.15963	3752799
					0.15991	372957
					0.16019	3706277
					0.16047	3682922
					0.16075	3659509
					0.16103	3636041
					0.16131	361252
					0.16159	358895
					0.16187	3565334
					0.16215	3541674
					0.16243	3517974
					0.16271	3494236
					0.16299	3470464
					0.16327	3446659
					0.16355	3422826
					0.16383	3398967
					0.16411	3375085
					0.1645	3342214
					0.16832	3015954
					0.1686	2992074
					0.16888	2968216
					0.16916	2944383
					0.16944	2920578
					0.16972	2896803
					0.17	2873059
					0.17028	2849351
					0.17056	2825679
					0.17084	2802047
					0.17112	2778457
					0.1714	275491
					0.17168	2731409
					0.17196	2707958
					0.17224	2684556
					0.17252	2661208
					0.1728	2637914
					0.17308	2614678
					0.17336	25915
					0.17364	2568384
					0.17392	2545332
					0.1742	2522344
					0.17448	2499424
					0.1745	2498198
					0.17477	2476573
					0.17505	2453793
					0.17533	2431087
					0.17561	2408455
					0.17589	23859
					0.17617	2363423
					0.17645	2341027
					0.17673	2318713
					0.17701	2296482
					0.17729	2274337
					0.17757	2252279
					0.17785	223031
					0.17813	2208431
					0.17841	2186644
					0.17869	2164951
					0.17897	2143352
					0.17925	212185
					0.17953	2100445
					0.17981	207914
					0.18009	2057935
					0.18037	2036832
					0.18065	2015832
					0.18093	1994937
					0.18121	1974148
					0.18149	1953465
					0.18177	1932891
					0.18205	1912426
					0.18233	1892072
					0.18261	1871829
					0.18289	1851698
					0.18317	1831682
					0.18345	181178
					0.18373	1791993
					0.18401	1772323
					0.18429	1752771
					0.1845	1738531
					0.18458	1733337
					0.18486	1714023
					0.18514	1694828
					0.18542	1675754
					0.1857	1656802
					0.18598	1637972
					0.18626	1619266
					0.18654	1600683
					0.18682	1582225
					0.1871	1563891
					0.18738	1545683
					0.18766	1527602
					0.18794	1509647
					0.18822	149182
					0.1885	147412
					0.18878	1456549
					0.18906	1439106
					0.18934	1421792
					0.18962	1404608
					0.1899	1387553
					0.19018	1370629
					0.19046	1353835
					0.19074	1337172
					0.19102	1320639
					0.1913	1304238
					0.19158	1287968
					0.19186	127183
					0.19214	1255824
					0.19242	1239949
					0.1927	1224206
					0.19298	1208596
					0.19326	1193117
					0.19354	1177771
					0.19382	1162556
					0.1941	1147474
					0.19438	1132524
					0.1945	1126422
					0.19467	1117706
					0.19495	1103019
					0.19523	1088465
					0.19551	1074042
					0.19579	1059751
					0.19607	1045592
					0.19635	1031564
					0.19663	1017666
					0.19691	10039
					0.19719	990264
					0.19747	976759
					0.19775	963384
					0.19803	950138
					0.19831	937023
					0.19859	924036
					0.19887	911178
					0.19915	898448
					0.19943	885847
					0.19971	873373
					0.19999	861027
					0.20027	848808
					0.20055	836715
					0.20083	824748
					0.20111	812906
					0.20139	80119
					0.20167	789598
					0.20195	77813
					0.20223	766786
					0.20251	755564
					0.20279	744465
					0.20307	733488
					0.20335	722632
					0.20363	711897
					0.20391	701282
					0.20419	690786
					0.20447	68041
					0.2045	679489
					0.20476	670151
					0.20504	660011
					0.20532	649987
					0.2056	640079
					0.20588	630287
					0.20616	62061
					0.20644	611048
					0.20672	601599
					0.207	592262
					0.20728	583038
					0.20756	573926
					0.20784	564924
					0.20812	556032
					0.2084	547249
					0.20868	538575
					0.20896	530008
					0.20924	521549
					0.20952	513195
					0.2098	504947
					0.21008	496804
					0.21036	488765
					0.21064	480829
					0.21092	472995
					0.2112	465262
					0.21148	457631
					0.21176	450099
					0.21204	442666
					0.21232	435332
					0.2126	428095
					0.21288	420955
					0.21316	41391
					0.21344	406961
					0.21372	400106
					0.214	393344
					0.21428	386675
					0.2145	381616
					0.21457	380098
					0.21485	373611
					0.21513	367215
					0.21541	360907
					0.21569	354689
					0.21597	348557
					0.21625	342513
					0.21653	336554
					0.21681	330681
					0.21709	324892
					0.21737	319186
					0.21765	313563
					0.21793	308022
					0.21821	302561
					0.21849	297181
					0.21877	29188
					0.21905	286657
					0.21933	281512
					0.21961	276444
					0.21989	271452
					0.22017	266535
					0.22045	261693
					0.22073	256924
					0.22101	252228
					0.22129	247603
					0.22157	24305
					0.22185	238567
					0.22213	234154
					0.22241	22981
					0.22269	225533
					0.22297	221323
					0.22325	21718
					0.22353	213103
					0.22381	20909
					0.22409	205142
					0.22437	201256
					0.2245	199542
					0.22466	197433
					0.22494	193672
					0.22522	189972
					0.2255	186332
					0.22578	182752
					0.22606	17923
					0.22634	175767
					0.22662	17236
					0.2269	16901
					0.22718	165716
					0.22746	162477
					0.22774	159292
					0.22802	156162
					0.2283	153083
					0.22858	150058
					0.22886	147083
					0.22914	14416
					0.22942	141287
					0.2297	138463
					0.22998	135688
					0.23026	132961
					0.23054	130282
					0.23082	12765
					0.2311	125063
					0.23138	122523
					0.23166	120027
					0.23194	117575
					0.23222	115167
					0.2325	112802
					0.23278	110479
					0.23306	108198
					0.23334	105959
					0.23362	103759
					0.2339	1016
					0.23418	0.9948
					0.23446	0.97399
					0.2345	0.97141
					0.23475	0.95356
					0.23503	0.93351
					0.23531	0.91382
					0.23559	0.8945
					0.23587	0.87554
					0.23615	0.85694
					0.23643	0.83868
					0.23671	0.82077
					0.23699	0.80319
					0.23727	0.78594
					0.23755	0.76903
					0.23783	0.75243
					0.23811	0.73615
					0.23839	0.72019
					0.23867	0.70453
					0.23895	0.68917
					0.23923	0.67411
					0.23951	0.65934
					0.23979	0.64485
					0.24007	0.63065
					0.24035	0.61673
					0.24063	0.60309
					0.24091	0.58971
					0.24119	0.57659
					0.24147	0.56374
					0.24175	0.55114
					0.24203	0.53879
					0.24231	0.52669
					0.24259	0.51483
					0.24287	0.50321
					0.24315	0.49183
					0.24343	0.48068
					0.24371	0.46975
					0.24399	0.45904
					0.24427	0.44856
					0.2445	0.44029
					0.24456	0.43829
					0.24484	0.42823
					0.24512	0.41838
					0.2454	0.40873
					0.24568	0.39928
					0.24596	0.39003
					0.24624	0.38097
					0.24652	0.3721
					0.2468	0.36342
					0.24708	0.35491
					0.24736	0.34659
					0.24764	0.33845
					0.24792	0.33048
					0.2482	0.32267
					0.24848	0.31504
					0.24876	0.30756
					0.24904	0.30025
					0.24932	0.2931
					0.2496	0.2861
					0.24988	0.27925
					0.25016	0.27255
					0.25044	0.26599
					0.25072	0.25958
					0.251	0.25331
					0.25128	0.24718
					0.25156	0.24118
					0.25184	0.23531
					0.25212	0.22958
					0.2524	0.22397
					0.25268	0.21848
					0.25296	0.21312
					0.25324	0.20788
					0.25352	0.20275
					0.2538	0.19775
					0.25408	0.19285
					0.25436	0.18806
					0.2545	0.1858
					0.25465	0.18339
					0.25493	0.17882
					0.25521	0.17435
					0.25549	0.16998
					0.25577	0.16572
					0.25605	0.16155
					0.25633	0.15748
					0.25661	0.1535
					0.25689	0.14962
					0.25717	0.14582
					0.25745	0.14212
					0.25773	0.1385
					0.25801	0.13496
					0.25829	0.13151
					0.25857	0.12814
					0.25885	0.12485
					0.25913	0.12163
					0.25941	0.11849
					0.25969	0.11543
					0.25997	0.11244
					0.26025	0.10952
					0.26053	0.10667
					0.26081	0.10389
					0.26109	0.10117
					0.26137	0.09853
					0.26165	0.09594
					0.26193	0.09342
					0.26221	0.09096
					0.26249	0.08856
					0.26277	0.08621
					0.26305	0.08393
					0.26333	0.0817
					0.26361	0.07952
					0.26389	0.0774
					0.26417	0.07533
					0.26445	0.07331
					0.2645	0.073
					0.26474	0.07135
					0.26502	0.06943
					0.2653	0.06756
					0.26558	0.06573
					0.26586	0.06395
					0.26614	0.06222
					0.26642	0.06053
					0.2667	0.05888
					0.26698	0.05728
					0.26726	0.05571
					0.26754	0.05419
					0.26782	0.0527
					0.2681	0.05125
					0.26838	0.04984
					0.26866	0.04846
					0.26894	0.04712
					0.26922	0.04582
					0.2695	0.04454
