# Supplementary material for: The actomyosin system is essential for the integrity of the endosomal system in bloodstream form Trypanosoma brucei
Source: eLife journal article supplement (doi:10.7554/elife.96953), 2024-05-01
Supplement: fig3-data1 [file elife-96953-fig3-data1-v1.zip]

## Sheet: Tabelle1
	BSA					Transferrin
dataset	230306_BSA_555_TbMyo1_mNG_DAPI_1	230306_BSA_555_TbMyo1_mNG_DAPI_2				dataset	230306_Tf_568_TbMyo1_mNG_DAPI_1	230306_Tf_568_TbMyo1_mNG_DAPI_2
Image	Spearman	Image	Spearman			Image	Spearman	Image	Spearman
Series10_ROI_0	0.2446	Series10_ROI_0	0.1609			Series10_ROI_0	0.1764	Series10_ROI_0	0.2186
Series10_ROI_1	0.2046	Series1_ROI_0	0.2115			Series10_ROI_1	0.181	Series10_ROI_1	0.2365
Series10_ROI_2	0.1845	Series1_ROI_1	0.1458			Series10_ROI_2	0.1737	Series10_ROI_2	0.2475
Series11_ROI_0	0.1783	Series1_ROI_2	0.2055			Series10_ROI_3	0.2236	Series10_ROI_3	0.2649
Series11_ROI_1	0.1426	Series1_ROI_3	0.215			Series11_ROI_0	0.1713	Series10_ROI_4	0.1831
Series12_ROI_0	0.1572	Series2_ROI_0	0.1622			Series11_ROI_1	0.1896	Series1_ROI_0	0.2471
Series12_ROI_1	0.2008	Series2_ROI_1	0.1442			Series11_ROI_2	0.1865	Series1_ROI_1	0.2121
Series13_ROI_0	0.1323	Series2_ROI_2	0.1479			Series11_ROI_3	0.1749	Series1_ROI_2	0.2062
Series13_ROI_1	0.1801	Series2_ROI_3	0.1406			Series11_ROI_4	0.1784	Series1_ROI_3	0.219
Series13_ROI_2	0.1541	Series3_ROI_0	0.2281			Series1_ROI_0	0.3043	Series2_ROI_0	0.2643
Series1_ROI_0	0.1732	Series3_ROI_1	0.1463			Series1_ROI_1	0.2308	Series2_ROI_1	0.2263
Series1_ROI_1	0.1741	Series3_ROI_2	0.1612			Series1_ROI_2	0.1614	Series2_ROI_2	0.2525
Series1_ROI_2	0.1268	Series4_ROI_0	0.1869			Series2_ROI_0	0.1783	Series3_ROI_0	0.1624
Series2_ROI_0	0.1213	Series4_ROI_1	0.1722			Series2_ROI_1	0.1473	Series3_ROI_1	0.2902
Series2_ROI_1	0.128	Series4_ROI_2	0.2275			Series2_ROI_2	0.164	Series3_ROI_2	0.3109
Series2_ROI_2	0.1245	Series5_ROI_0	0.1525			Series3_ROI_0	0.1673	Series4_ROI_0	0.2035
Series3_ROI_0	0.1825	Series5_ROI_1	0.2967			Series3_ROI_1	0.2361	Series4_ROI_1	0.3132
Series3_ROI_1	0.1837	Series5_ROI_2	0.1682			Series3_ROI_2	0.2455	Series4_ROI_2	0.2574
Series3_ROI_2	0.126	Series6_ROI_0	0.1771			Series4_ROI_0	0.1573	Series4_ROI_3	0.2754
Series3_ROI_3	0.1895	Series6_ROI_1	0.1467			Series4_ROI_1	0.1864	Series5_ROI_0	0.3046
Series4_ROI_0	0.1957	Series7_ROI_0	0.1188			Series4_ROI_2	0.186	Series5_ROI_1	0.1879
Series4_ROI_1	0.1387	Series7_ROI_1	0.1621			Series5_ROI_0	0.1515	Series5_ROI_2	0.2363
Series4_ROI_2	0.1859	Series8_ROI_0	0.1886			Series5_ROI_1	0.2039	Series5_ROI_3	0.2436
Series5_ROI_0	0.1748	Series8_ROI_1	0.1685			Series5_ROI_2	0.1595	Series6_ROI_0	0.1993
Series5_ROI_1	0.123	Series9_ROI_0	0.1917			Series6_ROI_0	0.2096	Series6_ROI_1	0.2707
Series5_ROI_2	0.1858	Series9_ROI_1	0.1231			Series6_ROI_1	0.2376	Series6_ROI_2	0.2751
Series5_ROI_3	0.1801					Series7_ROI_0	0.1654	Series7_ROI_0	0.1669
Series5_ROI_4	0.2038					Series7_ROI_1	0.1586	Series7_ROI_1	0.1984
Series6_ROI_0	0.216					Series7_ROI_2	0.2353	Series7_ROI_2	0.1773
Series6_ROI_1	0.1876					Series7_ROI_3	0.1548	Series8_ROI_0	0.2045
Series6_ROI_2	0.1733					Series7_ROI_4	0.1726	Series8_ROI_1	0.2277
Series6_ROI_3	0.1746					Series8_ROI_0	0.1981	Series8_ROI_2	0.2043
Series7_ROI_0	0.1942					Series8_ROI_1	0.1868	Series8_ROI_3	0.1789
Series7_ROI_1	0.1594					Series8_ROI_2	0.1668	Series8_ROI_4	0.2156
Series7_ROI_2	0.154					Series8_ROI_3	0.2164	Series9_ROI_0	0.1847
Series7_ROI_3	0.1592					Series9_ROI_0	0.2025	Series9_ROI_1	0.2526
Series8_ROI_0	0.1676					Series9_ROI_1	0.203	Series9_ROI_2	0.1991
Series8_ROI_1	0.1553					Series9_ROI_2	0.2181
Series8_ROI_2	0.2943					Series9_ROI_3	0.17
Series8_ROI_3	0.1962					Series9_ROI_4	0.1265
Series9_ROI_0	0.1407
Series9_ROI_1	0.1695
Series9_ROI_2	0.2024
								Median	0.203
	Median	0.1732
