# Supplementary material for: The actomyosin system is essential for the integrity of the endosomal system in bloodstream form Trypanosoma brucei
Source: eLife journal article supplement (doi:10.7554/elife.96953), 2024-05-01
Supplement: fig3-data1 [file PanelC_Markers_Correlation_analysis.xlsx]

## Sheet: Tabelle1
Picture_ID	Spearman	Group	Markers
BiP_Series2_ROI_2	0.1833	A	BiP
BiP_Series2_ROI_3	0.291	A	BiP
BiP_Series3_ROI_0	0.3092	A	BiP
BiP_Series3_ROI_1	0.3194	A	BiP
BiP_Series3_ROI_2	0.3676	A	BiP
BiP_Series3_ROI_3	0.3069	A	BiP
BiP_Series3_ROI_4	0.5792	A	BiP
BiP_Series1_ROI_0	0.246	A	BiP
BiP_Series1_ROI_1	0.2589	A	BiP
BiP_Series1_ROI_2	0.2857	A	BiP
BiP_Series1_ROI_0	0.4337	A	BiP
BiP_Series2_ROI_0	0.3221	A	BiP
BiP_Series2_ROI_1	0.4005	A	BiP
BiP_Series2_ROI_2	0.3573	A	BiP
BiP_Series3_ROI_0	0.3542	A	BiP
BiP_Series3_ROI_1	0.2335	A	BiP
BiP_Series3_ROI_2	0.4897	A	BiP
BiP_Series1_ROI_0	0.2708	A	BiP
BiP_Series1_ROI_1	0.3725	A	BiP
BiP_Series2_ROI_0	0.4221	A	BiP
BiP_Series2_ROI_1	0.4843	A	BiP
BiP_Series1_ROI_1	0.2228	A	BiP
BiP_Series3_ROI_0	0.6124	A	BiP
BiP_Series3_ROI_1	0.3935	A	BiP
BiP_Series1_ROI_0	0.3718	A	BiP
BiP_Series2_ROI_0	0.3542	A	BiP
BiP_Series2_ROI_1	0.5736	A	BiP
BiP_Series3_ROI_0	0.3624	A	BiP
BiP_Series3_ROI_1	0.3064	A	BiP
BiP_Series4_ROI_0	0.29	A	BiP
BiP_Series4_ROI_1	0.3554	A	BiP
BiP_Series1_ROI_2	0.3884	A	BiP
BiP_Series1_ROI_3	0.2468	A	BiP
BiP_Series1_ROI_4	0.3626	A	BiP
BiP_Series1_ROI_5	0.27	A	BiP
BiP_Series1_ROI_6	0.4337	A	BiP
BiP_Series2_ROI_0	0.3103	A	BiP
BiP_Series2_ROI_1	0.2985	A	BiP
GRASP_Series2_ROI_1	0.288	B	GRASP
GRASP_Series3_ROI_0	0.3858	B	GRASP
GRASP_Series3_ROI_1	0.3857	B	GRASP
GRASP_Series1_ROI_0	0.2066	B	GRASP
GRASP_Series1_ROI_1	0.2689	B	GRASP
GRASP_Series2_ROI_0	0.3304	B	GRASP
GRASP_Series2_ROI_1	0.2333	B	GRASP
GRASP_Series3_ROI_0	0.2274	B	GRASP
GRASP_Series3_ROI_1	0.2455	B	GRASP
GRASP_Series1_ROI_0	0.2977	B	GRASP
GRASP_Series1_ROI_0	0.3603	B	GRASP
GRASGRASP_Series1_ROI_1P_Series1_ROI_1	0.2243	B	GRASP
GRASP_Series2_ROI_0	0.285	B	GRASP
GRASP_Series2_ROI_1	0.2748	B	GRASP
GRASP_Series3_ROI_0	0.299	B	GRASP
GRASP_Series3_ROI_1	0.1973	B	GRASP
GRASP_Series4_ROI_0	0.304	B	GRASP
GRASP_Series4_ROI_1	0.1983	B	GRASP
GRASP_Series5_ROI_0	0.3026	B	GRASP
GRASP_Series5_ROI_1	0.3218	B	GRASP
GRASP_Series1_ROI_1	0.5019	B	GRASP
GRASP_Series2_ROI_0	0.5136	B	GRASP
GRASP_Series2_ROI_1	0.453	B	GRASP
GRASP_Series3_ROI_0	0.3767	B	GRASP
GRASP_Series3_ROI_1	0.2583	B	GRASP
GRASP_Series1_ROI_0	0.326	B	GRASP
GRASP_Series1_ROI_1	0.3706	B	GRASP
GRASP_Series2_ROI_0	0.2742	B	GRASP
p67_Series3_ROI_0	0.2957	C	p67
p67_Series4_ROI_0	0.5611	C	p67
p67_Series4_ROI_1	0.2866	C	p67
p67_Series1_ROI_0	0.7909	C	p67
p67_Series2_ROI_0	0.5482	C	p67
p67_Series2_ROI_1	0.5283	C	p67
p67_Series3_ROI_0	0.4871	C	p67
p67_Series3_ROI_1	0.622	C	p67
p67_Series4_ROI_0	0.7795	C	p67
p67_Series4_ROI_1	0.625	C	p67
p67_Series1_ROI_0	0.4166	C	p67
p67_Series1_ROI_0	0.3921	C	p67
p67_Series1_ROI_1	0.3922	C	p67
p67_Series2_ROI_0	0.5167	C	p67
p67_Series3_ROI_0	0.3584	C	p67
p67_Series3_ROI_1	0.4437	C	p67
p67_Series4_ROI_0	0.4717	C	p67
p67_Series5_ROI_0	0.4252	C	p67
p67_Series5_ROI_1	0.723	C	p67
p67_Series2_ROI_0	0.2685	C	p67
p67_Series2_ROI_1	0.207	C	p67
p67_Series3_ROI_0	0.2281	C	p67
p67_Series3_ROI_1	0.2233	C	p67
p67_Series4_ROI_0	0.357	C	p67
p67_Series4_ROI_1	0.2864	C	p67
p67_Series1_ROI_0	0.5305	C	p67
p67_Series2_ROI_0	0.2348	C	p67
p67 median	0.4252
GRASP median	0.29835
BiP median	0.3542
