# Supplementary material for: The actomyosin system is essential for the integrity of the endosomal system in bloodstream form Trypanosoma brucei
Source: eLife journal article supplement (doi:10.7554/elife.96953), 2024-05-01
Supplement: fig4-data1 [file PanelI_EM_immunogold_Myo1_quantification.xlsx]

## Sheet: Tabelle1
image_ID	Endosomal membrane	Vesicle	Cytoplasm	Flagellar Pocket	Glycosome	Total Gold	representative image?
M3_37143_002	0	0	9	1	1	11	no
M3_37143_003	0	0	3	0	0	3	no
M3_37143_004	0	0	0	0	2	2	no
M3_37143_005	0	2	4	1	0	7	no
M3_37143_006	2	0	1	0	0	3	maybe
M3_37143_007	same image before					0
M3_37143_008	0	0	3	0	6	9	no
M3_37143_009	2	0	2	0	0	4	no
M3_37143_010	1	0	0	0	0	1	no
M3_37143_011	2	0	1	0	1	4	maybe
M3_37143_012	bad image					0
M3_37143_013	0	0	14	0	0	14	no
M3_37143_014	0	0	0	3	1	4	no
M3_37143_015	2	0	7	0	0	9	no
M3_37143_016	2	0	8	0	0	10	no
M3_37143_017	bad image					0
M3_37143_018	1	0	2	0	0	3	no
M3_37143_019	bad image					0
M3_37143_020	0	0	15	0	0	15	no
M3_37143_021	0	0	8	0	0	8	no
M3_37143_022	0	0	4	0	2	6	no
M3_37143_023	0	0	4	0	2	6	no
M3_37143_024	2	0	0	0	0	2	maybe
M3_37143_025	bad image					0
M3_37143_026	bad image					0
M3_37143_027	bad image					0
M3_37143_028	2	1	7	0	0	10	no
M3_37143_029	0	1	2	0	8	11	maybe if glycosomes
M3_37143_030	bad image					0
M3_37143_031	3	0	0	0	3	6	no
M3_37143_032	1	0	6	0	2	9	no
M3_37143_033	0	0	14	0	2	16	no
M4_37143_002	0	0	4	0	2	6	no
M4_37143_003	1	0	8	0	0	9	no
M4_37143_004	0	0	7	0	0	7	no
M4_37143_005	0	0	0	5	0	5	no	lower part is in image 004
M4_37143_006	0	0	6	0	0	6	no
M4_37143_007	1	1	1	1	0	4	maybe
M4_37143_008	1	0	2	1	0	4	no
M4_37143_009	0	0	15	0	0	15	no
M4_37143_010	0	0	6	0	0	6
M4_37143_011	bad image					0
M4_37143_012	0	2	6	0	0	8	yes
M4_37143_013	0	1	4	2	0	7	no
M4_37143_014	0	0	3	0	0	3	no
M4_37143_015	0	1	0	2	0	3	no
M4_37143_016	bad image					0
M4_37143_017	bad image					0
M4_37143_018	bad image					0
M4_37143_019	0	2	3	1	0	6	maybe
M4_37143_020	3	0	1	0	2	6	maybe
M4_37143_021	bad image					0
M4_37143_022	1	0	1	0	5	7	maybe
M4_37143_023	0	0	1	3	6	10	no
M4_37143_024	0	0	4	0	0	4	no
M4_37143_025	0	2	0	0	0	2	no
M4_37143_026	0	3	4	0	0	7	no
M4_37143_027	1	0	1	4	0	6	maybe pocket
M4_37143_028	1	0	6	0	0	7	maybe
M4_37143_029	5	1	2	0	0	8	yes
M4_37143_030	2	4	5	0	0	11	maybe
M4_37143_031	bad image					0
M4_37143_032	bad image					0
M4_37143_033	0	0	3	1	2	6	no
M4_37143_034	0	0	9	0	8	17	no
M4_37143_035	bad image					0
M4_37143_036	bad image					0
M4_37143_037	1	0	3	0	0	4	no
M4_37143_038	2	0	1	3	0	6	maybe if pocket
M4_37143_039	3	0	4	0	0	7	maybe
M4_37143_040	3	0	0	0	0	3	maybe
M4_37143_041	1	0	0	0	0	1	no
M4_37143_042	1	0	0	0	0	1	no
M4_37143_043	2	0	1	0	4	7	no
M4_37143_044	0	0	5	0	0	5	no
M4_37143_045	0	0	2	0	2	4	no
M4_37143_046	1	0	0	0	1	2	no
M4_37143_047	0	0	0	6	0	6	yes
M4_37143_048	0	0	8	0	4	12	no
M4_37143_049	0	0	2	0	2	4	no
M4_37143_050	2	0	2	1	1	6	no
M4_37143_051	10	1	2	0	1	14	maybe, but dirty
M4_37143_052	1	0	6	0	4	11	no
M4_37143_053	1	1	1	0	0	3	no
M4_37143_054	3	3	0	0	2	8	maybe
M4_37143_055	0	0	0	2	0	2	no
M4_37143_056	2	1	2	0	0	5	no
M4_37143_057	1	0	0	0	0	1	no
M4_37143_058	0	1	4	2	0	7	no
M4_37143_059	0	0	3	0	0	3	no
M4_37143_060	4	0	7	0	0	11	maybe
M4_37143_061	0	0	1	1	0	2	no
M4_37143_062	2	0	13	0	0	15	no
M4_37143_063	0	0	6	0	0	6	no
M4_37143_064	2	0	7	0	0	9	no
images = 79
Sum	78	28	296	40	76	518
percentage	0.15	0.05	0.57	0.08	0.15
