# Supplementary material for: The actomyosin system is essential for the integrity of the endosomal system in bloodstream form Trypanosoma brucei
Source: eLife journal article supplement (doi:10.7554/elife.96953), 2024-05-01
Supplement: fig4-figsupp1-data1 [file elife-96953-fig4-figsupp1-data1-v1.zip]

## Sheet: Tabelle1
Coloc Rab5A and Myo1				Coloc Rab7 and Myo1				Coloc Rab11 and Myo1
image	Pearson	Spearman		image	Pearson	Spearman		image	Pearson	Spearman
coverslip1_Series1_ROI_0	0.4534	0.1938		coverslip1_Series1_ROI_0	0.3206	0.2166		coverslip1_Series1_ROI_0	0.1304	0.2019
coverslip1_Series1_ROI_1	0.4469	0.2183		coverslip1_Series1_ROI_1	0.3563	0.1368		coverslip1_Series1_ROI_1	0.0305	0.1808
coverslip1_Series1_ROI_2	0.3325	0.2306		coverslip1_Series1_ROI_2	0.1437	0.1347		coverslip1_Series1_ROI_2	0.09817	0.1736
coverslip1_Series2_ROI_0	0.07853	0.1881		coverslip1_Series1_ROI_3	0.1983	0.2571		coverslip1_Series1_ROI_3	0.2154	0.1833
coverslip1_Series2_ROI_1	0.6521	0.166		coverslip1_Series1_ROI_4	0.3469	0.1627		coverslip1_Series2_ROI_0	0.4958	0.2316
coverslip1_Series2_ROI_2	0.1566	0.1638		coverslip1_Series2_ROI_0	0.4339	0.205		coverslip1_Series2_ROI_1	0.07774	0.156
coverslip1_Series2_ROI_3	0.3175	0.1917		coverslip1_Series2_ROI_1	0.5757	0.2046		coverslip1_Series2_ROI_2	0.02091	0.1618
coverslip1_Series3_ROI_0	0.1776	0.1952		coverslip1_Series2_ROI_2	0.1927	0.1304		coverslip1_Series2_ROI_3	0.1344	0.1526
coverslip1_Series3_ROI_1	0.1865	0.1821		coverslip1_Series2_ROI_3	0.2348	0.1806		coverslip1_Series3_ROI_0	0.6015	0.1945
coverslip1_Series3_ROI_2	0.6569	0.1515		coverslip1_Series3_ROI_0	0.3905	0.1929		coverslip1_Series3_ROI_1	0.26	0.2422
coverslip1_Series4_ROI_0	0.1468	0.1991		coverslip1_Series3_ROI_1	0.4631	0.1692		coverslip1_Series3_ROI_2	0.09202	0.2246
coverslip1_Series4_ROI_1	0.1723	0.1655		coverslip1_Series3_ROI_2	0.2614	0.1596		coverslip1_Series3_ROI_3	0.211	0.1928
coverslip1_Series4_ROI_2	0.803	0.1993		coverslip1_Series3_ROI_3	0.7067	0.171		coverslip1_Series4_ROI_0	0.04637	0.1663
coverslip1_Series5_ROI_0	0.4607	0.2164		coverslip1_Series4_ROI_0	0.1608	0.1853		coverslip1_Series4_ROI_1	0.0143	0.1182
coverslip1_Series5_ROI_1	0.4584	0.2317		coverslip1_Series4_ROI_1	0.51	0.155		coverslip1_Series4_ROI_2	0.07652	0.1511
coverslip1_Series6_ROI_0	0.1226	0.2065		coverslip1_Series5_ROI_0	0.3262	0.2312		coverslip1_Series4_ROI_3	0.4738	0.2006
coverslip1_Series6_ROI_1	0.3329	0.1678		coverslip1_Series5_ROI_1	0.4693	0.1675		coverslip1_Series5_ROI_0	0.09735	0.1938
coverslip1_Series6_ROI_2	0.4083	0.1952		coverslip1_Series5_ROI_2	0.408	0.1427		coverslip1_Series5_ROI_1	0.2938	0.179
								coverslip1_Series5_ROI_2	0.1234	0.1524
coverslip2_Series1_ROI_0	0.2976	0.1556		coverslip2_Series1_ROI_0	0.2052	0.2807		coverslip1_Series5_ROI_3	0.13	0.1417
coverslip2_Series1_ROI_1	0.6888	0.2105		coverslip2_Series1_ROI_1	0.704	0.274
coverslip2_Series1_ROI_2	0.3561	0.1925		coverslip2_Series1_ROI_2	0.2824	0.1382		coverslip2_Series1_ROI_0	0.1873	0.2206
coverslip2_Series2_ROI_0	0.3352	0.1825		coverslip2_Series1_ROI_3	0.2013	0.1426		coverslip2_Series1_ROI_1	0.09402	0.2761
coverslip2_Series2_ROI_1	0.6393	0.157		coverslip2_Series2_ROI_0	0.1749	0.1518		coverslip2_Series1_ROI_2	0.3897	0.1949
coverslip2_Series2_ROI_2	0.3548	0.2361		coverslip2_Series2_ROI_1	0.2972	0.1906		coverslip2_Series2_ROI_0	0.3644	0.1791
coverslip2_Series3_ROI_0	0.1654	0.1608		coverslip2_Series2_ROI_2	0.2567	0.299		coverslip2_Series2_ROI_1	0.01299	0.1682
coverslip2_Series3_ROI_1	0.2821	0.1713		coverslip2_Series3_ROI_0	0.4175	0.233		coverslip2_Series2_ROI_2	0.3565	0.1237
coverslip2_Series3_ROI_2	0.5937	0.195		coverslip2_Series3_ROI_1	0.3368	0.2198		coverslip2_Series2_ROI_3	0.05693	0.1167
coverslip2_Series4_ROI_0	0.3549	0.1707		coverslip2_Series3_ROI_2	0.4432	0.1894		coverslip2_Series2_ROI_4	0.1499	0.1565
coverslip2_Series4_ROI_1	0.4743	0.1624		coverslip2_Series3_ROI_3	0.469	0.208		coverslip2_Series3_ROI_0	0.131	0.1505
coverslip2_Series5_ROI_0	0.647	0.1922		coverslip2_Series4_ROI_0	0.1823	0.1752		coverslip2_Series3_ROI_1	0.1236	0.1396
coverslip2_Series5_ROI_1	0.464	0.196		coverslip2_Series4_ROI_1	0.5442	0.1762		coverslip2_Series3_ROI_2	0.05806	0.1838
coverslip2_Series5_ROI_2	0.4658	0.1916		coverslip2_Series4_ROI_2	0.1816	0.1329		coverslip2_Series3_ROI_3	0.03037	0.1256
coverslip2_Series5_ROI_3	0.6465	0.2169		coverslip2_Series5_ROI_0	0.362	0.2149		coverslip2_Series3_ROI_4	0.0885	0.1953
coverslip2_Series6_ROI_0	0.4415	0.1667		coverslip2_Series5_ROI_1	0.6331	0.2284		coverslip2_Series4_ROI_0	0.06408	0.1978
coverslip2_Series6_ROI_1	0.4072	0.1219		coverslip2_Series5_ROI_2	0.4252	0.2251		coverslip2_Series4_ROI_1	0.1109	0.1814
coverslip2_Series6_ROI_2	0.5051	0.2112		coverslip2_Series5_ROI_3	0.2359	0.2045		coverslip2_Series4_ROI_2	0.1126	0.1964
								coverslip2_Series4_ROI_3	0.08511	0.224
coverslip3_Series1_ROI_0	0.5645	0.2465		coverslip3_Series1_ROI_0	0.1512	0.2665		coverslip2_Series4_ROI_4	0.01554	0.2152
coverslip3_Series1_ROI_1	0.5398	0.2023		coverslip3_Series1_ROI_1	0.354	0.2331		coverslip2_Series5_ROI_0	0.2125	0.1602
coverslip3_Series1_ROI_2	0.4494	0.2118		coverslip3_Series1_ROI_2	0.05129	0.1925		coverslip2_Series5_ROI_1	0.1068	0.1412
coverslip3_Series2_ROI_0	0.4009	0.2333		coverslip3_Series1_ROI_3	0.3889	0.2606		coverslip2_Series5_ROI_2	0.2241	0.1701
coverslip3_Series2_ROI_1	0.5934	0.1693		coverslip3_Series1_ROI_4	0.09448	0.221		coverslip2_Series5_ROI_3	0.3222	0.1858
coverslip3_Series3_ROI_0	0.2696	0.2216		coverslip3_Series2_ROI_0	0.4171	0.2858		coverslip2_Series5_ROI_4	0.05184	0.1397
coverslip3_Series3_ROI_1	0.5017	0.2056		coverslip3_Series2_ROI_1	0.4377	0.1863
coverslip3_Series3_ROI_2	0.5195	0.1765		coverslip3_Series2_ROI_2	0.332	0.2258		coverslip3_Series1_ROI_0	0.01812	0.1618
coverslip3_Series4_ROI_0	0.4595	0.2038		coverslip3_Series3_ROI_0	0.2089	0.2122		coverslip3_Series1_ROI_1	0.06914	0.2682
coverslip3_Series4_ROI_1	0.3036	0.1569		coverslip3_Series3_ROI_1	0.4861	0.15		coverslip3_Series1_ROI_2	0.05811	0.1641
coverslip3_Series4_ROI_2	0.2978	0.1755		coverslip3_Series3_ROI_2	0.414	0.1912		coverslip3_Series1_ROI_3	0.0348	0.1749
coverslip3_Series5_ROI_0	0.3439	0.2149		coverslip3_Series4_ROI_0	0.3708	0.1547		coverslip3_Series1_ROI_4	0.04724	0.2069
coverslip3_Series5_ROI_1	0.6876	0.2538		coverslip3_Series4_ROI_1	0.08672	0.1408		coverslip3_Series2_ROI_0	0.04796	0.167
coverslip3_Series5_ROI_2	0.1828	0.192		coverslip3_Series4_ROI_2	0.1816	0.1455		coverslip3_Series2_ROI_1	0.07325	0.1572
				coverslip3_Series5_ROI_0	0.2938	0.2218		coverslip3_Series2_ROI_2	0.02028	0.1776
coverslip4_Series1_ROI_0	0.6935	0.1377		coverslip3_Series5_ROI_1	0.4304	0.265		coverslip3_Series3_ROI_0	0.1329	0.2272
coverslip4_Series1_ROI_1	0.6043	0.1823		coverslip3_Series5_ROI_2	0.1001	0.1784		coverslip3_Series3_ROI_1	0.01806	0.2294
coverslip4_Series1_ROI_2	0.3173	0.1658		coverslip3_Series5_ROI_3	0.4274	0.2329		coverslip3_Series3_ROI_2	0.1062	0.2373
coverslip4_Series2_ROI_0	0.7603	0.1481						coverslip3_Series3_ROI_3	0.03525	0.183
coverslip4_Series2_ROI_1	0.4223	0.1684		coverslip4_Series1_ROI_0	0.1538	0.2374		coverslip3_Series3_ROI_4	0.1887	0.1398
coverslip4_Series3_ROI_0	0.7134	0.1484		coverslip4_Series1_ROI_1	0.04801	0.1738		coverslip3_Series4_ROI_0	0.1408	0.2607
coverslip4_Series3_ROI_1	0.2685	0.207		coverslip4_Series1_ROI_2	0.2753	0.2023		coverslip3_Series4_ROI_1	0.04127	0.1358
coverslip4_Series3_ROI_2	0.3668	0.165		coverslip4_Series1_ROI_3	0.2909	0.2097		coverslip3_Series4_ROI_2	0.04247	0.16
coverslip4_Series3_ROI_3	0.4687	0.1697		coverslip4_Series2_ROI_0	0.4604	0.2561		coverslip3_Series5_ROI_0	0.4534	0.1854
coverslip4_Series4_ROI_0	0.1993	0.2131		coverslip4_Series2_ROI_1	0.4399	0.163		coverslip3_Series5_ROI_1	0.1138	0.1591
coverslip4_Series4_ROI_1	0.2754	0.2419		coverslip4_Series2_ROI_2	0.3772	0.3125		coverslip3_Series5_ROI_2	0.2141	0.2202
coverslip4_Series4_ROI_2	0.3284	0.1687		coverslip4_Series3_ROI_0	0.1673	0.1704		coverslip3_Series5_ROI_3	0.04399	0.2757
coverslip4_Series5_ROI_0	0.6654	0.1381		coverslip4_Series3_ROI_1	0.1903	0.272		coverslip3_Series5_ROI_4	0.06834	0.2216
coverslip4_Series5_ROI_1	0.1998	0.195		coverslip4_Series3_ROI_2	0.3331	0.1536		coverslip3_Series5_ROI_5	0.02067	0.1299
coverslip4_Series5_ROI_2	0.8164	0.2619		coverslip4_Series3_ROI_3	0.0316	0.1752
coverslip4_Series5_ROI_3	0.4224	0.2701		coverslip4_Series3_ROI_4	0.5582	0.234		coverslip4_Series1_ROI_0	0.1022	0.163
				coverslip4_Series4_ROI_0	0.08003	0.1966		coverslip4_Series1_ROI_1	0.04201	0.1553
median	0.42235	0.1921		coverslip4_Series4_ROI_1	0.108	0.1644		coverslip4_Series1_ROI_2	0.09625	0.2027
				coverslip4_Series4_ROI_2	0.2661	0.2903		coverslip4_Series1_ROI_3	0.1331	0.2334
				coverslip4_Series4_ROI_3	0.08383	0.253		coverslip4_Series2_ROI_0	0.1262	0.1776
				coverslip4_Series5_ROI_0	0.2518	0.3001		coverslip4_Series2_ROI_1	0.1345	0.1516
				coverslip4_Series5_ROI_1	0.3592	0.2299		coverslip4_Series2_ROI_2	0.01342	0.1648
				coverslip4_Series5_ROI_2	0.4705	0.2635		coverslip4_Series2_ROI_3	0.1341	0.1869
								coverslip4_Series2_ROI_4	0.1089	0.1347
				median	0.3262	0.2023		coverslip4_Series2_ROI_5	0.05147	0.1751
								coverslip4_Series3_ROI_0	0.05441	0.1845
								coverslip4_Series3_ROI_1	0.1904	0.1553
								coverslip4_Series3_ROI_2	0.2221	0.2818
								coverslip4_Series3_ROI_3	0.1495	0.2315
								coverslip4_Series4_ROI_0	0.05236	0.1088
								coverslip4_Series4_ROI_1	0.05536	0.2361
								coverslip4_Series4_ROI_2	0.0659	0.2297
								coverslip4_Series4_ROI_3	0.1291	0.2089
								coverslip4_Series5_ROI_0	0.03025	0.1487
								coverslip4_Series5_ROI_1	0.1961	0.2488
								coverslip4_Series5_ROI_2	0.01325	0.1676
								median	0.09776	0.17905
