# Supplementary material for: The actomyosin system is essential for the integrity of the endosomal system in bloodstream form Trypanosoma brucei
Source: eLife journal article supplement (doi:10.7554/elife.96953), 2024-05-01
Supplement: fig6-data1 [file elife-96953-fig6-data1-v1.zip]

## Sheet: Tabelle1
datasaet	2022_06.17_Pfa-Fix_actin chrom_tet+_colabel anti-Myo1	2022_06.17_Pfa-Fix_actin chrom_tet+_colabel anti-Myo1_actin 300 ms
Image	Spearman	Image	Spearman
Series1_ROI_2	0.443	Series1_ROI_1	0.6964
Series4_ROI_2	0.4243	Series1_ROI_2	0.7124
Series5_ROI_0	0.6243	Series1_ROI_3	0.616
Series5_ROI_1	0.7541	Series1_ROI_4	0.5954
Series5_ROI_2	0.632	Series2_ROI_0	0.5089
Series6_ROI_1	0.7177	Series2_ROI_1	0.7756
Series6_ROI_2	0.8339	Series2_ROI_4	0.8101
Series6_ROI_3	0.4029	Series2_ROI_5	0.6382
Series6_ROI_4	0.4258	Series3_ROI_0	0.6616
Series6_ROI_5	0.5055	Series3_ROI_1	0.5759
		Series3_ROI_2	0.6495
		Series3_ROI_3	0.8661
		Series3_ROI_4	0.5932
		Median	0.632
		Mittelwert	0.628817
