# Supplementary material for: The actomyosin system is essential for the integrity of the endosomal system in bloodstream form Trypanosoma brucei
Source: eLife journal article supplement (doi:10.7554/elife.96953), 2024-05-01
Supplement: fig7-data1 [file elife-96953-fig7-data1-v1.zip]

## Sheet: Tabellenblatt1
counted were only 1K1N cells
230829_coverslip1		normal	swollen posterior	round	230829_coverslip2		normal	swollen posterior	round	230821		normal	swollen posterior	round
0 hours	Series001	9	0	0	0 hours	Series001	3	0	0	0 hours	Series001	2	0	0
	Series002	6	0	0		Series002	7	2	0		Series002	2	0	0
	Series003	6	0	0		Series003	13	5	2		Series004	3	0	0
	Series004	4	0	0		Series004	11	3	0		Series005	2	0	0
	Series005	4	0	0		Series005	21	5	0		Series006	4	0	0
	Series006	15	1	0	1 hour	Series001	4	3	7		Series007	8	0	0
	Series007	22	6	1		Series002	4	7	3		Series008	5	0	0
	Series008	21	4	0		Series003	6	4	3		Series009	4	0	0
1 hour	Series001	6	10	3		Series004	8	5	5	1 hour	Series001	2	2	0
	Series002	10	8	4		Series005	13	9	2		Series002	4	1	1
	Series003	4	6	3	2 hours	Series001	0	13	18		Series003	6	2	0
	Series004	8	6	0		Series002	3	15	16		Series004	20	8	0
	Series005	8	2	6		Series003	1	8	8		Series005	15	10	1
2 hours	Series001	2	4	4		Series004	3	7	9		Series006	11	2	1
	Series002	4	15	6		Series005	2	4	7		Series007	4	5	1
	Series003	2	12	5	3 hours	Series001	0	8	31		Series008	10	3	0
	Series004	1	13	6		Series002	0	9	18	2 hours	Series001	0	2	0
	Series005	1	11	9		Series003	0	8	20		Series002	0	2	0
3 hours	Series001	0	12	27		Series004	1	7	14		Series003	0	1	0
	Series002	0	12	25		Series005	1	4	30		Series004	1	0	0
	Series003	0	9	20	4 hours	Series001	0	0	9		Series005	2	2	0
	Series004	2	8	18		Series002	0	2	11		Series006	0	2	0
	Series005	0	4	28		Series003	0	0	6		Series007	1	1	0
4 hours	Series001	0	1	12		Series004	0	2	9		Series008	1	0	0
	Series002	0	2	8		Series005	0	2	13		Series009	1	3	0
	Series003	0	1	14							Series010	0	1	1
	Series004	0	0	18						3 hours	Series001	0	5	0
	Series005	0	2	19							Series002	0	4	3
											Series003	0	1	4
											Series004	0	3	0
											Series005	1	5	6
											Series006	1	9	12
											Series007	0	13	21
											Series008	0	12	21
										4 hours	Series001	0	4	1
											Series002	0	7	10
											Series003	0	3	2
											Series004	0	3	3
											Series005	0	4	2
											Series006	0	3	2
											Series007	0	4	9
											Series008	0	5	14
	normal	swollen	round	total
0 hours	172	26	3	201
percentage (x100)	0.855721	0.129353	0.0149254
1 hour	143	93	40	276
percentage (x100)	0.518116	0.336957	0.144928
2 hours	25	116	89	230
percentage (x100)	0.108696	0.504348	0.386957
3 hours	6	133	298	437
percentage (x100)	0.01373	0.304348	0.681922
4 hours	0	45	162	207
percentage (x100)	0	0.217391	0.782609
