# Supplementary material for: The actomyosin system is essential for the integrity of the endosomal system in bloodstream form Trypanosoma brucei
Source: eLife journal article supplement (doi:10.7554/elife.96953), 2024-05-01
Supplement: fig7-figsupp1-data1 [file elife-96953-fig7-figsupp1-data1-v1.zip]

## Sheet: Sheet1
TbMyo1 RNAi: 2 independent experiments, each with 3 clones, split every 48h
Experiment 1		Population density (cells/ml)
time (d)	Time (h)	C1 Tet-	C2 Tet-	C3 Tet-	C1 Tet+	C2 Tet+	C3 Tet+
0	0	5000	5000	5000	5000	5000	5000
1	24	108500	101750	109000	91000	91750	106250
2	48	1220000	1079000	1185000	738000	268750	824250
2	48	5000	5000	5000	5000	5000	5000
3	72	148000	141500	108500	104250	87750	95750
4	96	1809000	1678000	1607000	511750	535500	276250
Experiment 2		Population density (cells/ml)
time (d)	Time (h)	C1 Tet-	C2 Tet-	C3 Tet-	C1 Tet+	C2 Tet+	C3 Tet+
0	0	5000	5000	5000	5000	5000	5000
1	24	104250	111000	95250	81750	65750	75250
2	48	1098000	1243000	925000	549750	215500	260500
2	48	5000	5000	5000	5000	5000	5000
3	72	159250	147000	109000	80750	70500	44500
4	96	2093000	1828000	1296000	533000	437000	208750
Generate mean values											Generate overall +/- Tet mean values
Experiment 1+2		Population density (cells/ml)									Experiment 1+2		Population density (cells/ml)
time (d)		C1 Tet-	C2 Tet-	C3 Tet-	C1 Tet+	C2 Tet+	C3 Tet+				time (d)		C1,C2,C3 Tet-	C1,C2,C3 Tet+	Tet- SD	Tet+ SD
0	0	5000	5000	5000	5000	5000	5000				0	0	5000	5000	0	0
1	24	106375	106375	102125	86375	78750	90750				1	24	104958	85291.7	5838.27	14204.2
2	48	1159000	1161000	1055000	643875	242125	542375				2	48	1125000	476125	117808	265561
2	48	5000	5000	5000	5000	5000	5000				2	48	5000	5000	0	0
3	72	153625	144250	108750	92500	79125	70125				3	72	135542	80583.3	21539.7	21190.6
4	96	1951000	1753000	1451500	522375	486250	242500				4	96	1718500	417042	265710	141460
