# Supplementary figures and images for: The actomyosin system is essential for the integrity of the endosomal system in bloodstream form Trypanosoma brucei
Source: eLife journal article supplement (doi:10.7554/elife.96953), 2024-05-01

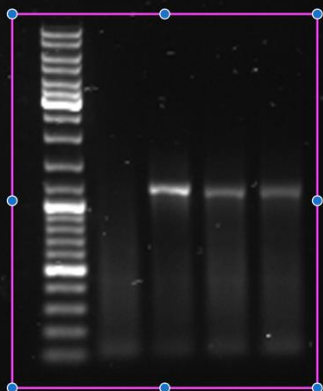

Panel A  
Display area outlined  
in magenta

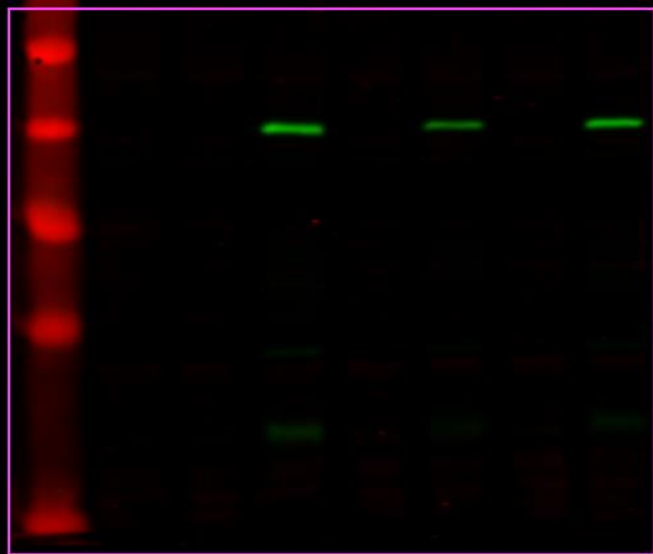

Panel B  
Display area outlined  
in magenta

Supplement: fig6-figsupp1-data1 [file elife-96953-fig6-figsupp1-data1-v1.zip]

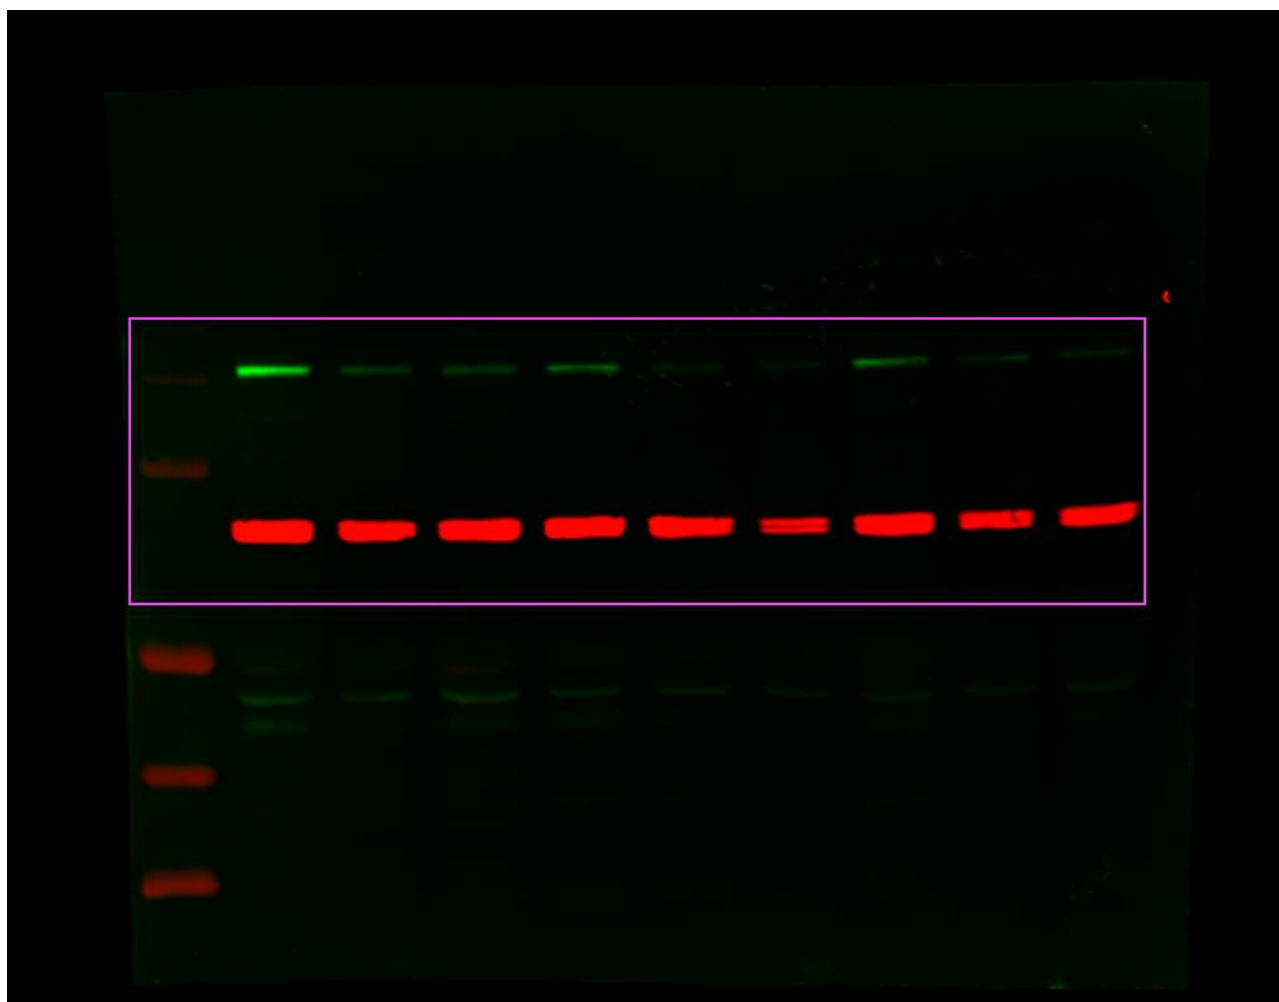

Panel B

Display area outlined in magenta

Supplement: fig7-figsupp1-data1 [file elife-96953-fig7-figsupp1-data1-v1.zip]
